# Supplementary material for: SARS-CoV-2 infection risk by non-healthcare occupations: a systematic review and meta-analysis
Source: Springer Nature journal article supplement (doi:10.1186/s12995-025-00462-9), 2025-05-22
Supplement: MOESM1 [file 12995_2025_462_MOESM1_ESM.pdf]

Appendix A

|     |                                                                            |    |
|-----|----------------------------------------------------------------------------|----|
| A.  | Appendix.....                                                              | 2  |
| A.1 | Search strings.....                                                        | 2  |
| A.2 | justification for full texts' exclusion and excluded texts by reasons..... | 4  |
| A.3 | GRADE.....                                                                 | 11 |
| A.4 | Individual results' graphs.....                                            | 12 |
| A.5 | subgroup analyses .....                                                    | 32 |

## Appendix A

### A.1 Search strings

#### A.1.1 PubMed

Tab. A.1-1: applied search strings in Medline via PubMed on February 1<sup>st</sup>, 2022

|            |                                                                                                                                                                                                                                                                                                                                                                                                                                                                                                                                                                                                                                                                                                                                                                                                                                                                                                                                                                                                                                                                                                                                                                                                                                                                                                                                                                                                                                                                                                                                                                                                    |
|------------|----------------------------------------------------------------------------------------------------------------------------------------------------------------------------------------------------------------------------------------------------------------------------------------------------------------------------------------------------------------------------------------------------------------------------------------------------------------------------------------------------------------------------------------------------------------------------------------------------------------------------------------------------------------------------------------------------------------------------------------------------------------------------------------------------------------------------------------------------------------------------------------------------------------------------------------------------------------------------------------------------------------------------------------------------------------------------------------------------------------------------------------------------------------------------------------------------------------------------------------------------------------------------------------------------------------------------------------------------------------------------------------------------------------------------------------------------------------------------------------------------------------------------------------------------------------------------------------------------|
| Exposure   | ("occupational diseases"[MeSH Terms] OR<br>"occupational exposure"[MeSH Terms] OR<br>"occupational medicine"[MeSH Terms] OR "occupational risk"[Text Word] OR<br>"occupational hazard"[Text Word] OR "occupational group*"[Text Word] OR<br>("industry"[MeSH Terms] AND "mortality"[MeSH Subheading]) OR<br>"work-related"[All Fields] OR "air pollutants, occupational"[MeSH Terms] OR<br>"working environment"[Text Word] OR "occupational health"[MeSH Terms] OR<br>"workplace"[MeSH Terms] OR "profession*"[Text Word] OR<br>"job"[Text Word] OR "occupation*"[Text Word] OR "work*"[Text Word]) AND "employ*"[Text Word]                                                                                                                                                                                                                                                                                                                                                                                                                                                                                                                                                                                                                                                                                                                                                                                                                                                                                                                                                                      |
| Outcome    | ("Coronavirus"[MeSH Terms] OR "Coronavirus"[All Fields] OR<br>"coronaviruses"[All Fields] OR "corona virus"[All Fields] OR<br>("Coronaviridae"[MeSH Terms] OR "Coronaviridae"[All Fields] OR<br>"coronavirinae"[All Fields]) OR ("Coronaviridae"[MeSH Terms] OR<br>"Coronaviridae"[All Fields]) OR ("Betacoronavirus"[MeSH Terms] OR<br>"Betacoronavirus"[All Fields] OR "betacoronaviruses"[All Fields]) OR<br>("COVID-19"[MeSH Terms] OR "COVID-19"[All Fields] OR<br>"covid19"[All Fields]) OR "COVID-19"[All Fields] OR<br>("SARS-CoV-2"[MeSH Terms] OR "SARS-CoV-2"[All Fields] OR<br>"ncov"[All Fields]) OR "CoV 2"[All Fields] OR "CoV2"[All Fields] OR<br>"sarscov2"[All Fields] OR "2019nCoV"[All Fields] OR "novel CoV"[All Fields] OR<br>"wuhan virus"[All Fields] OR ("wuhan"[All Fields] OR "hubei"[All Fields] OR<br>"huanan"[All Fields]) AND ("severe acute respiratory"[All Fields]<br>OR ("pneumonia"[MeSH Terms] OR "pneumonia"[All Fields] OR<br>"pneumonias"[All Fields] OR "pneumoniae"[All Fields] OR<br>"pneumoniae s"[All Fields])) AND ("disease outbreaks"[MeSH Terms] OR<br>("disease"[All Fields] AND "outbreaks"[All Fields]) OR<br>"disease outbreaks"[All Fields] OR "outbreak"[All Fields] OR<br>"epidemiology"[MeSH Subheading] OR<br>"epidemiology"[All Fields] OR "outbreaks"[All Fields] OR<br>"outbreak s"[All Fields])) OR<br>"Coronavirus"[MeSH Terms] OR "Coronavirus Infections"[MeSH Terms] OR<br>"COVID-19"[Supplementary Concept] OR<br>"severe acute respiratory syndrome coronavirus 2"[Supplementary Concept] OR<br>"Betacoronavirus"[MeSH Terms]) |
| Limitation | (2020/1/1:3000/12/12[pdat])                                                                                                                                                                                                                                                                                                                                                                                                                                                                                                                                                                                                                                                                                                                                                                                                                                                                                                                                                                                                                                                                                                                                                                                                                                                                                                                                                                                                                                                                                                                                                                        |

## A.1.2 EMBASE

Tab. A.1-2: applied search strings in EMBASE on February 1<sup>st</sup>, 2022.

|            |                                                                                                                                                                                                                                                                                                                                                                                                                                                                                                                                                                                                                                                                                                                                                                                                                                                                                                                                                                                                                                                                                                                                                                                                                                                                                                                                                                                                                                                                                                                                                                                                                                                                                                                                                                                                                                                                                                                                                                                                                                                                                                        |
|------------|--------------------------------------------------------------------------------------------------------------------------------------------------------------------------------------------------------------------------------------------------------------------------------------------------------------------------------------------------------------------------------------------------------------------------------------------------------------------------------------------------------------------------------------------------------------------------------------------------------------------------------------------------------------------------------------------------------------------------------------------------------------------------------------------------------------------------------------------------------------------------------------------------------------------------------------------------------------------------------------------------------------------------------------------------------------------------------------------------------------------------------------------------------------------------------------------------------------------------------------------------------------------------------------------------------------------------------------------------------------------------------------------------------------------------------------------------------------------------------------------------------------------------------------------------------------------------------------------------------------------------------------------------------------------------------------------------------------------------------------------------------------------------------------------------------------------------------------------------------------------------------------------------------------------------------------------------------------------------------------------------------------------------------------------------------------------------------------------------------|
| Exposure   | ('occupational groups' OR 'worker'/exp/mj OR 'occupational hazard'/exp/mj<br>OR 'occupational danger' OR 'occupational hazard' OR 'occupational risk'<br>OR 'workplace'/exp/mj OR 'work'/exp/mj OR 'occupational disease'/exp/mj<br>OR 'occupational medicine' OR 'occupational accident'/exp/mj<br>OR 'work environment'/exp/mj OR 'occupational safety')<br>AND                                                                                                                                                                                                                                                                                                                                                                                                                                                                                                                                                                                                                                                                                                                                                                                                                                                                                                                                                                                                                                                                                                                                                                                                                                                                                                                                                                                                                                                                                                                                                                                                                                                                                                                                      |
| Outcome    | ('severe acute respiratory syndrome coronavirus 2'/exp/mj<br>OR 'coronavirus disease 2019'/exp/mj OR 'coronavirus infection'<br>OR 'coronaviridae infection' OR 'coronavirinae' OR 'corona virus'<br>OR 'betacoronavirus' OR 'beta coronavirus' OR 'wuhan virus' OR 'covid19'<br>OR 'coronavirus disease 2019' OR '2019 novel coronavirus disease'<br>OR '2019 novel coronavirus epidemic' OR '2019 novel coronavirus infection'<br>OR '2019-ncov disease' OR '2019-ncov infection' OR 'covid' OR 'covid 19'<br>OR 'covid 19 induced pneumonia' OR 'covid-10' OR 'covid-19'<br>OR 'covid-19 induced pneumonia' OR 'covid-19 pneumonia'<br>OR 'sars coronavirus 2 infection' OR 'sars coronavirus 2 pneumonia'<br>OR 'sars-cov-2 disease' OR 'sars-cov-2 infection' OR 'sars-cov-2 pneumonia'<br>OR 'sars-cov2 disease' OR 'sars-cov2 infection' OR 'sarscov2 disease'<br>OR 'sarscov2 infection' OR 'wuhan coronavirus disease'<br>OR 'wuhan coronavirus infection' OR 'coronavirus disease 2'<br>OR 'coronavirus disease 2010' OR 'coronavirus disease 2019'<br>OR 'coronavirus disease 2019 pneumonia' OR 'coronavirus disease-19'<br>OR 'coronavirus infection 2019' OR 'ncov 2019 disease' OR 'ncov 2019 infection' OR 'new coronavirus pneumonia' OR 'novel coronavirus 2019 disease'<br>OR 'novel coronavirus 2019 infection' OR 'novel coronavirus disease 2019'<br>OR 'novel coronavirus infected pneumonia'<br>OR 'novel coronavirus infection 2019' OR 'novel coronavirus pneumonia'<br>OR 'paucisymptomatic coronavirus disease 2019'<br>OR 'severe acute respiratory syndrome 2'<br>OR 'severe acute respiratory syndrome 2 pneumonia'<br>OR 'severe acute respiratory syndrome cov-2 infection'<br>OR 'severe acute respiratory syndrome coronavirus 2 infection'<br>OR 'severe acute respiratory syndrome coronavirus 2019 infection' OR 'covid 19' OR 'ncov' OR 'cov 2' OR 'cov2' OR 'sarscov2' OR '2019ncov'<br>OR '2019 novel coronavirus' OR 'severe acute respiratory or pneumonia'<br>OR 'coronavirus' OR 'coronavir*' OR 'betacoronavir*'<br>OR '2019 novel coronavirus*')<br>AND |
| Limitation | [2020-2022]/py                                                                                                                                                                                                                                                                                                                                                                                                                                                                                                                                                                                                                                                                                                                                                                                                                                                                                                                                                                                                                                                                                                                                                                                                                                                                                                                                                                                                                                                                                                                                                                                                                                                                                                                                                                                                                                                                                                                                                                                                                                                                                         |

**Appendix A – Justification for full texts' exclusion and excluded texts by reasons****A.1.3 medRxiv**Tab. A.1-3: applied search in medRxiv on February 2<sup>nd</sup>, 2022.

|                      |                                                                                                                                                                                                                                                                                                                                                                                                                                                                                                                                                                                                                                                                              |
|----------------------|------------------------------------------------------------------------------------------------------------------------------------------------------------------------------------------------------------------------------------------------------------------------------------------------------------------------------------------------------------------------------------------------------------------------------------------------------------------------------------------------------------------------------------------------------------------------------------------------------------------------------------------------------------------------------|
| Outcome AND exposure | Abstract or Title: COVID-19 AND employee<br>Abstract or Title: COVID-19 AND employment<br>Abstract or Title: COVID-19 AND job<br>Abstract or Title: COVID-19 AND occupation<br>Abstract or Title: COVID-19 AND occupational exposure<br>Abstract or Title: COVID-19 AND worker<br>Abstract or Title: COVID-19 AND workplace<br><br>Abstract or Title: SARS-CoV-2 AND employee<br>Abstract or Title: SARS-CoV-2 AND employment<br>Abstract or Title: SARS-CoV-2 AND job<br>Abstract or Title: SARS-CoV-2 AND occupation<br>Abstract or Title: SARS-CoV-2 AND occupational exposure<br>Abstract or Title: SARS-CoV-2 AND worker<br>Abstract or Title: SARS-CoV-2 AND workplace |
| Limitation           | date posted: 01.01.2020-02.02.2022                                                                                                                                                                                                                                                                                                                                                                                                                                                                                                                                                                                                                                           |

**A.2 Justification for full texts' exclusion and excluded texts by reasons**

Tab. A.2-1: categories for excluding full texts.

|              |                                                                                                                                                                 |
|--------------|-----------------------------------------------------------------------------------------------------------------------------------------------------------------|
| population   | non-working or unemployed population, age below 16                                                                                                              |
| exposition   | studies include only workers in health service facilities (i.e., health care workers and other employees in inpatient and outpatient care and in welfare)       |
| occupation   | no occupational groups given                                                                                                                                    |
| comparison   | without comparison group                                                                                                                                        |
| outcome      | other infectious diseases only; long COVID only                                                                                                                 |
| infection    | no number for infected persons given                                                                                                                            |
| study design | RCTs, qualitative studies, ecological studies, case reports, (quasi-) experimental studies, comments, letters, editorials, congress abstracts, posters, reviews |
| response     | a response lower than 10 % of the selected population; no information on response given; convenience sample                                                     |
| else         | multiple testing; modelling results; no results reported for occupations in studies with other aim of analysis;                                                 |

**A.2.1 population**

No exclusions due to this reason.

**A.2.2 exposition**

| authors                    | ye   | title                                                                                                                |
|----------------------------|------|----------------------------------------------------------------------------------------------------------------------|
| Goetz, Delaughder et al.   | 2020 | Asymptomatic Employee Screening for SARS-CoV-2: Implementation of and Reactions to an Employer-Based Testing Program |
| Majiya, Aliyu-Paiko et al. | 2021 | Seroprevalence of SARS-CoV-2 in Niger State: A Pilot Cross Sectional Study                                           |
| Ward, Atchison et al.      | 2020 | Antibody prevalence for SARS-CoV-2 in England following first peak of the pandemic: REACT2 study in 100,000 adults   |
| Warszawski, Meyer et al.   | 2021 | Trends in social exposure to SARS-Cov-2 in France. Evidence from the national socio-epidemiological cohort - EPICOV  |

**Appendix A – Justification for full texts' exclusion and excluded texts by reasons****A.2.3 occupation**

| authors                            | ye   | title                                                                                                                                                                                            |
|------------------------------------|------|--------------------------------------------------------------------------------------------------------------------------------------------------------------------------------------------------|
| Aatresh, Cummings et al.           | 2021 | Development of at-home sample collection logistics for large scale SARS-CoV-2 seroprevalence studies                                                                                             |
| Al Kuwari, Abdul Rahim et al.      | 2020 | Characterization of the SARS-CoV-2 outbreak in the State of Qatar, February 28-April 18, 2020                                                                                                    |
| Anand, Allen et al.                | 2022 | Work-related and personal predictors of COVID-19 transmission: evidence from the UK and USA                                                                                                      |
| Anna, Goyard et al.                | 2020 | High seroprevalence but short-lived immune response to SARS-CoV-2 infection in Paris                                                                                                             |
| Aung, Vittinghoff et al.           | 2021 | Characteristics and Behaviors Associated with Prevalent SARS-CoV-2 Infection                                                                                                                     |
| Ayoubkhani, Nafilyan et al.        | 2020 | Ethnic minority groups in England and Wales - factors affecting the size and timing of elevated COVID-19 mortality: a retrospective cohort study linking Census and death records                |
| Bajunirwe et al.                   | 2021 | Long-distance truck drivers and the increasing risk of COVID-19 spread in Uganda                                                                                                                 |
| Barrett, Horton et al.             | 2020 | Prevalence of SARS-CoV-2 infection in previously undiagnosed health care workers at the onset of the U.S. COVID-19 epidemic                                                                      |
| Bartko, Zehetmayer et al.          | 2021 | Screening and Confirmatory Testing for SARS-CoV-2 Antibodies: Comparison of Health and Non-Health Workers in a Nationwide Healthcare Organization in Central Europe                              |
| Batty, Deary et al.                | 2020 | Psychosocial factors and hospitalisations for COVID-19: Prospective cohort study of the general population                                                                                       |
| Bontadi, Bergamo et al.            | 2020 | Efficacia delle misure volte a contenere la diffusione del virus Sars-Cov-2 negli ambienti di lavoro: un'indagine in nove aziende con sede nella regione Veneto                                  |
| Chamie, Marquez et al.             | 2020 | SARS-CoV-2 Community Transmission During Shelter-in-Place in San Francisco                                                                                                                       |
| Costa, Meireles et al.             | 2021 | Incidence of SARS-CoV-2 infection in a cohort of workers from the University of Porto                                                                                                            |
| Davis, Carr et al.                 | 2021 | Indicators of past COVID-19 infection status: Findings from a large occupational cohort of staff and postgraduate research students from a UK university                                         |
| Davis, Oetzmman et al.             | 2021 | Unexplained longitudinal variability in COVID-19 antibody status by Lateral Flow Immuno-Antibody testing                                                                                         |
| de la Rosa Ruiz and Guillén Astete | 2021 | [COVID-19: modification of the risk of infection and disease development associated with the performance of blended work.]                                                                       |
| De Negri, Galiezz et al.           | 2021 | Socioeconomic factors and the probability of death by Covid-19 in Brazil                                                                                                                         |
| Elliott, Bodinier et al.           | 2021 | COVID-19 mortality in the UK Biobank cohort: revisiting and evaluating risk factors                                                                                                              |
| Fatima, Bucks et al.               | 2021 | Shift work is associated with increased risk of COVID-19: Findings from the UK Biobank cohort                                                                                                    |
| Garbarino, Domnich et al.          | 2021 | Seroprevalence of SARS-CoV-2 in a Large Cohort of Italian Police Officers                                                                                                                        |
| Haag, Blankenburg et al.           | 2021 | Prevalence and Transmission of SARS-CoV-2 in Childcare Facilities: A Longitudinal Study                                                                                                          |
| Hassink, Kalb et al.               | 2021 | Regional Coronavirus Hotspots During the COVID-19 Outbreak in the Netherlands                                                                                                                    |
| Holt, Talaei et al.                | 2021 | Risk factors for developing COVID-19: a population-based longitudinal study (COVIDENCE UK)                                                                                                       |
| Jantzen, Noisel et al.             | 2020 | Epidemiological and socio-economic characteristics of the COVID-19 spring outbreak in Quebec, Canada: A population-based study                                                                   |
| Jeremijenko, Chemaitelly et al.    | 2020 | Evidence for and level of herd immunity against SARS-CoV-2 infection: the ten-community study                                                                                                    |
| Jerković, Ljubić et al.            | 2021 | SARS-CoV-2 Antibody Seroprevalence in Industry Workers in Split-Dalmatia and Šibenik-Knin County, Croatia                                                                                        |
| Kadyrova, Yegorov et al.           | 2021 | Seroprevalence of anti-SARS-CoV-2 IgG and IgA antibodies before the launch of COVID-19 vaccination in Kazakhstan                                                                                 |
| Kaspersen, Greve et al.            | 2021 | Symptoms reported by SARS-CoV-2 seropositive and seronegative healthcare and administrative employees in Denmark from May to August 2020                                                         |
| Labberton, Godoy et al.            | 2021 | SARS-CoV-2 infections and hospitalizations among immigrants in Norway: significance of occupation, household crowding, education, household income and medical risk. A nationwide register study |
| Laursen, Petersen et al.           | 2021 | Prevalence of SARS-CoV-2 IgG/IgM Antibodies among Danish and Swedish Falck Emergency and Non-Emergency Healthcare Workers                                                                        |

**Appendix A – Justification for full texts’ exclusion and excluded texts by reasons**

|                                 |      |                                                                                                                                                                                         |
|---------------------------------|------|-----------------------------------------------------------------------------------------------------------------------------------------------------------------------------------------|
| Lee, Han et al.                 | 2021 | Analysis of Superspreading Potential from Transmission Clusters of COVID-19 in South Korea                                                                                              |
| Leidi, Berner et al.            | 2021 | Occupational risk of SARS-CoV-2 infection and reinfection during the second pandemic surge: a cohort study                                                                              |
| Limaye, Ninesling et al.        | 2021 | COVID-19 Pandemic Response in a Migrant Farmworker Community: Excess Mortality, Testing Access and Contact Tracing in Immokalee, Florida                                                |
| Liu, Wu et al.                  | 2020 | Prevalence of IgG antibodies to SARS-CoV-2 in Wuhan -implications for the ability to produce long-lasting protective antibodies against SARS-CoV-2                                      |
| Maidstone, Anderson et al.      | 2021 | Shift work is associated with positive COVID-19 status in hospitalised patients                                                                                                         |
| Marshall, Bois et al.           | 2020 | Sentinel Coronavirus Environmental Monitoring Can Contribute to Detecting Asymptomatic SARS-CoV-2 Virus Spreaders and Can Verify Effectiveness of Workplace COVID-19 Controls           |
| Matthay, Duchowny et al.        | 2021 | Contributions of occupation characteristics and educational attainment to racial/ethnic inequities in COVID-19 mortality                                                                |
| Mema, Frosst et al.             | 2021 | COVID-19 outbreak among temporary foreign workers in British Columbia, March to May 2020                                                                                                |
| Nishikimi, Watanabe et al.      | 2022 | Prevalence of SARS-CoV-2 antibodies after one-year follow up among workers in a research institute in Japan                                                                             |
| Pathela, Crawley et al.         | 2021 | Seroprevalence of Severe Acute Respiratory Syndrome Coronavirus 2 Following the Largest Initial Epidemic Wave in the United States: Findings From New York City, 13 May to 21 July 2020 |
| Riley, Ainslie et al.           | 2020 | Transient dynamics of SARS-CoV-2 as England exited national lockdown                                                                                                                    |
| Riley, Ainslie et al.           | 2020 | Resurgence of SARS-CoV-2 in England: detection by community antigen surveillance                                                                                                        |
| Riley, Eales et al.             | 2021 | REACT-1 round 8 final report: high average prevalence with regional heterogeneity of trends in SARS-CoV-2 infection in the community in England during January 2021                     |
| Riley, Walters et al.           | 2021 | REACT-1 round 9 interim report: downward trend of SARS-CoV-2 in England in February 2021 but still at high prevalence                                                                   |
| Riley, Walters et al.           | 2021 | REACT-1 round 9 final report: Continued but slowing decline of prevalence of SARS-CoV-2 during national lockdown in England in February 2021                                            |
| Rowlands, Gillies et al.        | 2021 | Association of working shifts, inside and outside of healthcare, with severe COVID-19: an observational study                                                                           |
| Sarailoo et al.                 | 2021 | Investigating the relationship between occupation and SARS-CoV2                                                                                                                         |
| Shahani, Farouq et al.          | 2021 | Survey of COVID-19 associated symptoms and reported deaths in an urban community in Kano, Nigeria                                                                                       |
| Takita, Matsumura et al.        | 2020 | Preliminary Results of Seroprevalence of SARS-CoV-2 at Community Clinics in Tokyo                                                                                                       |
| Talaei, Faustini et al.         | 2022 | Determinants of pre-vaccination antibody responses to SARS-CoV-2: a population-based longitudinal study (COVIDENCE UK)                                                                  |
| Tejamaya, Phanprsit et al.      | 2022 | Characteristics of COVID-19 infection clusters occurring among workers in several Asia-Pacific countries                                                                                |
| Thielecke, Theuring et al.      | 2020 | SARS-CoV-2 infections in kindergartens and associated households at the start of the second wave in Berlin, Germany - a cross sectional study                                           |
| Tomasi, Ramirez-Cardenas et al. | 2021 | COVID-19 mortality among Amalgamated Transit Union (ATU) and Transport Workers Union (TWU) workers-March-July 2020, New York City metro area                                            |
| Tuček                           | 2021 | COVID-19 in the Czech Republic 2020: probable transmission of the coronavirus SARS-CoV-2                                                                                                |
| Wu, Xie et al.                  | 2021 | Epidemiological and clinical characteristics of severe acute respiratory coronavirus virus 2                                                                                            |
| Zhang, Saade et al.             | 2021 | SARS-CoV-2 Seroprevalence among First Responders in Northeastern Ohio                                                                                                                   |

**A.2.4 comparison**

| authors                   | ye   | title                                                                                                                                                                                                                                                         |
|---------------------------|------|---------------------------------------------------------------------------------------------------------------------------------------------------------------------------------------------------------------------------------------------------------------|
| Backhaus, Hermesen et al. | 2021 | Underascertainment of COVID-19 cases among first responders: a seroepidemiological study                                                                                                                                                                      |
| De Rooij, Sikkema et al.  | 2021 | Potential environmental transmission routes of SARS-CoV-2 inside a large meat processing plant experiencing COVID-19 clusters                                                                                                                                 |
| Di Leone, Drago et al.    | 2020 | [Integrated management method in the prevention department of a COVID-19 epidemic outbreak in a large meat processing plant in Bari province]                                                                                                                 |
| Dyal, Grant et al.        | 2020 | COVID-19 Among Workers in Meat and Poultry Processing Facilities - 19 States, April 2020                                                                                                                                                                      |
| Esposito, Neglia et al.   | 2021 | Epidemiology of SARS-CoV-2 Infection Evaluated by Immunochromatographic Rapid Testing for the Determination of IgM and IgG Against SARS-CoV-2 in a Cohort of Mask Wearing Workers in the Metal-Mechanical Sector in an Area With a High Incidence of COVID-19 |
| Finch, Lowe et al.        | 2021 | SARS-CoV-2 infection and reinfection in a seroepidemiological workplace cohort in the United States                                                                                                                                                           |

**Appendix A – Justification for full texts’ exclusion and excluded texts by reasons**

|                                |      |                                                                                                                                                                                                                                                                                                     |
|--------------------------------|------|-----------------------------------------------------------------------------------------------------------------------------------------------------------------------------------------------------------------------------------------------------------------------------------------------------|
| Gjestvang Moe et al.           | 2021 | SARS-CoV-2 serological findings and exposure risk among employees in school and retail after first and second wave COVID-19 pandemic in Oslo, Norway: a cohort study                                                                                                                                |
| Goldfarb et al.                | 2021 | SARS-CoV-2 seroprevalence among Vancouver public school staff in British Columbia, Canada                                                                                                                                                                                                           |
| Günther, Czech-Sioli et al.    | 2020 | SARS-CoV-2 outbreak investigation in a German meat processing plant                                                                                                                                                                                                                                 |
| Herstein, Degarege et al.      | 2021 | Characteristics of SARS-CoV-2 transmission among meat processing workers in Nebraska, USA, and effectiveness of risk mitigation measures                                                                                                                                                            |
| Hibino, Hayashida et al.       | 2021 | COVID-19 seropositivity changes in asymptomatic individuals during the second and third waves of COVID-19 in Tokyo                                                                                                                                                                                  |
| Kalia, Moraga et al.           | 2021 | Use of Vinegar and Water to Identify COVID-19 Cases During a Workplace Entrance Screening Protocol                                                                                                                                                                                                  |
| Kim                            | 2020 | Social Distancing and Public Health Guidelines at Workplaces in Korea: Responses to Coronavirus Disease-19                                                                                                                                                                                          |
| Kojima, Roshani et al.         | 2021 | Incidence of Severe Acute Respiratory Syndrome Coronavirus-2 infection among previously infected or vaccinated employees                                                                                                                                                                            |
| Krygier, Stepień et al.        | 2021 | Rapid serological tests for SARS-CoV-2 IgG/IgM - not worth attention?                                                                                                                                                                                                                               |
| Lan, Suharlim et al.           | 2021 | Association between SARS-CoV-2 infection, exposure risk and mental health among a cohort of essential retail workers in the USA                                                                                                                                                                     |
| Lan, Wei et al.                | 2020 | Work-related COVID-19 transmission in six Asian countries/areas: A follow-up study                                                                                                                                                                                                                  |
| Lewis, Dack et al.             | 2021 | Was the risk of death among the population of teachers and other school workers in England and Wales due to COVID-19 and all causes higher than other occupations during the pandemic in 2020? An ecological study using routinely collected data on deaths from the Office for National Statistics |
| Lopez, Weber et al.            | 2020 | Seroprevalence of anti-SARS-CoV-2 IgG Antibodies in the Staff of a Public School System in the Midwestern United States                                                                                                                                                                             |
| Malagón-Rojas, Parra et al.    | 2020 | Infection and risk perception of sars-cov-2 among airport workers: A mixed methods study                                                                                                                                                                                                            |
| Mallet, Pivette et al.         | 2021 | Identification of Workers at Increased Risk of Infection During a COVID-19 Outbreak in a Meat Processing Plant, France, May 2020                                                                                                                                                                    |
| Martins-Filho, Da Silva et al. | 2021 | Seroprevalence of SARS-CoV-2 antibodies in broadcast media workers                                                                                                                                                                                                                                  |
| Meireles, Amaro et al.         | 2021 | Prevalence of SARS-CoV-2 antibodies among workers of the public higher education institutions of Porto, Portugal: A cross-sectional study                                                                                                                                                           |
| Milleliri, Coulibaly et al.    | 2021 | SARS-CoV-2 in Ivory Coast: serosurveillance survey among mines workers                                                                                                                                                                                                                              |
| Ming, Han et al.               | 2020 | Environmental monitoring shows SARS-CoV-2 contamination of surfaces in food plants                                                                                                                                                                                                                  |
| Mioch, Kuiper et al.           | 2021 | SARS-CoV-2 antibodies in employees working in non-medical contact-intensive professions in the Netherlands: Baseline data from the prospective COco-study                                                                                                                                           |
| Modenese, Mazzoli et al.       | 2021 | Frequency of Anti-SARS-CoV-2 Antibodies in Various Occupational Sectors in an Industrialized Area of Northern Italy from May to October 2020                                                                                                                                                        |
| Nygren, Norén et al.           | 2021 | Association between SARS-CoV-2 and exposure risks in health care workers and university employees—a cross-sectional study                                                                                                                                                                           |
| Rosero, Mas et al.             | 2021 | COVID-19 Prevalence and prevention behaviors among US certified organic producers                                                                                                                                                                                                                   |
| Sendi, Baldan et al.           | 2021 | A multidimensional cross-sectional analysis of COVID-19 seroprevalence among a police officer cohort: The PoliCOV-19 study                                                                                                                                                                          |
| Steinberg, Kennedy et al.      | 2020 | COVID-19 Outbreak Among Employees at a Meat Processing Facility - South Dakota, March-April 2020                                                                                                                                                                                                    |
| Strathdee, Abramovitz et al.   | 2021 | Prevalence and correlates of SARS-CoV-2 seropositivity among people who inject drugs in the San Diego-Tijuana border region                                                                                                                                                                         |
| Thomas, Matthay et al.         | 2022 | A descriptive analysis of 2020 California Occupational Safety and Health Administration covid-19-related complaints                                                                                                                                                                                 |
| Thompson, Burgess et al.       | 2021 | Prevention and Attenuation of COVID-19 by BNT162b2 and mRNA-1273 Vaccines                                                                                                                                                                                                                           |
| Vieira, Tang et al.            | 2021 | SARS-CoV-2 antibody seroprevalence among firefighters in Orange County, California                                                                                                                                                                                                                  |
| Walshe, Fennelly et al.        | 2021 | Assessment of Environmental and Occupational Risk Factors for the Mitigation and Containment of a COVID-19 Outbreak in a Meat Processing Plant                                                                                                                                                      |
| Waltenburg, Rose et al.        | 2021 | Coronavirus disease among workers in food processing, food manufacturing, and agriculture workplaces                                                                                                                                                                                                |
| Waltenburg, Victoroff et al.   | 2020 | Update: COVID-19 Among Workers in Meat and Poultry Processing Facilities - United States, April-May 2020                                                                                                                                                                                            |

**A.2.5 outcome**

No exclusions due to this reason.

## Appendix A – Justification for full texts’ exclusion and excluded texts by reasons

### A.2.6 infection

| authors                               | ye   | title                                                                                                                                                                                                    |
|---------------------------------------|------|----------------------------------------------------------------------------------------------------------------------------------------------------------------------------------------------------------|
| Cox-Ganser and Henneberger            | 2021 | Occupations by Proximity and Indoor/Outdoor Work: Relevance to COVID-19 in All Workers and Black/Hispanic Workers                                                                                        |
| Crowell, Hanson et al.                | 2021 | Union Efforts to Reduce COVID-19 Infections Among Grocery Store Workers                                                                                                                                  |
| De Rooij, Hakze-Van Der Honing et al. | 2021 | Occupational and environmental exposure to SARS-CoV-2 in and around infected mink farms                                                                                                                  |
| Forster, Streng et al.                | 2022 | Feasibility of SARS-CoV-2 Surveillance Testing among Children and Childcare Workers at German Day Care Centers: A Nonrandomized Controlled Trial                                                         |
| Ljubic, Banovac et al.                | 2020 | The effect of serological screening for SARS-CoV-2 antibodies to participants’ attitudes and risk behaviour: a study on a tested population sample of industry workers in Split-Dalmatia County, Croatia |
| Lotfollahzadeh, Rastgoo et al.        | 2021 | Investigating the compliance of COVID-19 protocols in the workplaces of Ardabil, Iran                                                                                                                    |
| Marinaccio, Boccuni et al.            | 2020 | Occupational factors in the COVID-19 pandemic in Italy: Compensation claims applications support establishing an occupational surveillance system                                                        |
| Nelson, Fosdick et al.                | 2021 | Low prevalence of COVID-19 Exposure is Coincident with Self-reported Compliance with Public Health Guidelines among Essential Employees at an Institute of Higher Education                              |
| Nelson, Fosdick et al.                | 2021 | Association Between COVID-19 Exposure and Self-reported Compliance With Public Health Guidelines Among Essential Employees at an Institution of Higher Education in the US                               |
| Paskarini, Haqi et al.                | 2020 | Analysis of risk of exposure to COVID-19 in fishermen in Kenjeran                                                                                                                                        |

### A.2.7 study design

| authors                                 | ye   | title                                                                                                                                                     |
|-----------------------------------------|------|-----------------------------------------------------------------------------------------------------------------------------------------------------------|
| Albin, Anders et al.                    | 2021 | Risk of inpatient care with COVID-19 in different occupational groups: The role of close human contacts in the work environment                           |
| Al-Naemi, Hassanen et al.               | 2021 | Life span of Covid-19 antibodies following infection in a sample worker population in Qatar                                                               |
| Baysson, Pennachio et al.               | 2021 | The Specchio-COVID19 cohort study: a longitudinal follow-up of SARS-CoV-2 serosurvey participants in the canton of Geneva, Switzerland (Study protocol)   |
| Caban-Martinez, Gaglani et al.          | 2021 | High Burden of COVID-19 among Unvaccinated Law Enforcement Officers and Firefighters                                                                      |
| Chen, Aldridge et al.                   | 2021 | COVID-19 outbreak rates and infection attack rates associated with the workplace: a descriptive epidemiological study                                     |
| De and Price                            | 2021 | Pre-existing Economic Conditions and COVID-19 Infections and Mortality in New York City                                                                   |
| De Cassia Dos Santos Nery, Jouti et al. | 2021 | COVID-19 in essential activities: Report on successful measures in occupational health for 7,000 workers in an environmental sanitation company in Brazil |
| Feehan, Velasco et al.                  | 2021 | Racial and workplace disparities in seroprevalence of SARS-CoV-2, Baton Rouge, Louisiana, USA                                                             |
| Kern, Kuhlmann et al.                   | 2022 | SARS-CoV-2 surveillance (09/2020 - 03/2021) in elementary schools and daycare facilities in Bavaria                                                       |
| Lugg-Widger, Cannings-John et al.       | 2020 | Establishing the impact of COVID-19 on the health outcomes of domiciliary care workers in Wales using routine data: a protocol for the OSCAR study        |
| Methi, Telle et al.                     | 2021 | COVID-19 among bartenders and waiters before and after pub lockdown                                                                                       |
| Moret, Staley et al.                    | 2021 | Is COVID-19 an occupational disease?                                                                                                                      |
| Moura-Corrêa, Campos et al.             | 2021 | Exposure to SARS-COV-2 at work and coronavirus disease (COVID-19): Survey with workers                                                                    |
| Naicker, Jeebhay et al.                 | 2021 | Development and challenges of a national occupational health surveillance system for COVID-19 in the workplace                                            |
| Naidoo and Jeebhay                      | 2021 | COVID-19: A new burden of respiratory disease among South African miners?                                                                                 |
| Pearce et al.                           | 2021 | Occupational differences in COVID-19 incidence, severity, and mortality in the United Kingdom: Available data and framework for analyses                  |
| Pokora, Kutschbach et al.               | 2021 | Investigation of superspreading COVID-19 outbreak events in meat and poultry processing plants in Germany: A cross-sectional study                        |
| Rao, Ma et al.                          | 2021 | A disproportionate epidemic: COVID-19 cases and deaths among essential workers in Toronto, Canada                                                         |
| Straif, Espinosa et al.                 | 2021 | Occupational risk factors for SARS-COV-2 infection and COVID-19: Results from the covicat cohort study in Catalonia, Spain                                |
| Van Tongeren, Pearce et al.             | 2021 | Occupation and COVID-19 mortality in england: A national linked data study of 14.3 million adults                                                         |



**Appendix A – Justification for full texts’ exclusion and excluded texts by reasons****A.2.8 response**

| authors                               | ye   | title                                                                                                                                                                                        |
|---------------------------------------|------|----------------------------------------------------------------------------------------------------------------------------------------------------------------------------------------------|
| Abu-Raddad, Chemaitelly et al.        | 2020 | Characterizing the Qatar advanced-phase SARS-CoV-2 epidemic                                                                                                                                  |
| Airoidi, Calcagno et al.              | 2021 | Seroprevalence of SARS-CoV-2 Among Workers in Northern Italy                                                                                                                                 |
| Beale, Hoskins et al.                 | 2021 | Differential Risk of SARS-CoV-2 Infection by Occupation: Evidence from the Virus Watch prospective cohort study in England and Wales                                                         |
| Beale, Patel et al.                   | 2021 | Occupation, Work-Related Contact, and SARS-CoV-2 Anti-Nucleocapsid Serological Status: Findings from the Virus Watch prospective cohort study                                                |
| Beltrán, Basombrio et al.             | 2021 | [Knowledge, attitudes, and practices about COVID-19 in Argentina. A cross-sectional study]                                                                                                   |
| Berselli, Filippini et al.            | 2021 | Seroprevalence of anti-SARS-CoV-2 antibodies in the Northern Italy population before the COVID-19 second wave                                                                                |
| Cabas et al.                          | 2021 | Community pharmacists' exposure to COVID-19                                                                                                                                                  |
| Chadeau-Hyam, Eales et al.            | 2021 | REACT-1 round 15 interim report: High and rising prevalence of SARS-CoV-2 infection in England from end of September 2021 followed by a fall in late October 2021                            |
| Chen, Glymour et al.                  | 2021 | Excess mortality associated with the COVID-19 pandemic among Californians 18-65 years of age, by occupational sector and occupation: March through November 2020                             |
| Colmenares-Mejía, Serrano-Díaz et al. | 2021 | Seroprevalence of sars-cov-2 infection among occupational groups from the bucaramanga metropolitan area, Colombia                                                                            |
| Contreras, Ngo et al.                 | 2021 | Industry Sectors Highly Affected by Worksite Outbreaks of Coronavirus Disease, Los Angeles County, California, USA, March 19-September 30, 2020                                              |
| Eriksen, Fogh et al.                  | 2021 | SARS-CoV-2 antibody prevalence among homeless people, sex workers and shelter workers in Denmark: a nationwide cross-sectional study                                                         |
| Fenton, Gribben et al.                | 2021 | Risk of hospitalisation with COVID-19 among teachers compared to healthcare workers and other working-age adults. A nationwide case-control study                                            |
| Green and Semple                      | 2021 | Occupational inequalities in the prevalence of COVID-19: A longitudinal observational study of England, August 2020 to January 2021                                                          |
| Hiironen, Saavedra-Campos et al.      | 2020 | Occupational exposures associated with being a COVID-19 case. evidence from three case-control studies                                                                                       |
| Hua, Yin et al.                       | 2022 | Elevated COVID-19 Case Rates of Government Employees, District of Columbia, 2020-22                                                                                                          |
| Islamoglu, Cengiz et al.              | 2021 | COVID-19 seroconversion in the aircrew from Turkey                                                                                                                                           |
| Kabagambe, Velasco-Gonzalez et al.    | 2022 | Prevalence, Distribution and IgG Antibody Levels Associated with Severe Acute Respiratory Syndrome Coronavirus 2 (SARS-CoV-2) Among Health-System and Community-Based Employees and Patients |
| Kindzierski, Van Loon et al.          | 2021 | SARS-CoV-2 screening prevalence in educational staff in Berlin, Germany, June-December 2020                                                                                                  |
| Kotsiou, Pantazopoulos et al.         | 2021 | Repeated Antigen-Based Rapid Diagnostic Testing for Estimating the Coronavirus Disease 2019 Prevalence from the Perspective of the Workers' Vulnerability before and during the Lockdown     |
| Larsen, Fonager et al.                | 2021 | Preliminary report of an outbreak of SARS-CoV-2 in mink and mink farmers associated with community spread, Denmark, June to November 2020                                                    |
| Leightley, Vitiello et al.            | 2021 | The King's College London Coronavirus Health and Experiences of Colleagues at King's Study: SARS-CoV-2 antibody response in an occupational sample                                           |
| Lerdsamran, Mungaomklang et al.       | 2022 | Seroprevalence of anti-SARS coronavirus 2 antibodies in Thai adults during the first three epidemic waves                                                                                    |
| Lewnard, Mora et al.                  | 2021 | Prevalence and clinical profile of SARS-CoV-2 infection among farmworkers in Monterey County, California: June-November, 2020                                                                |
| Ling, Yu et al.                       | 2020 | Seroprevalence and epidemiological characteristics of immunoglobulin M and G antibodies against SARS-CoV-2 in asymptomatic people in Wuhan, China                                            |
| Liu, Yang et al.                      | 2021 | Occupational characteristics in the outbreak of the covid-19 delta variant in nanjing, china: Rethinking the occupational health and safety vulnerability of essential workers               |
| Ly, Nguyen et al.                     | 2021 | Screening of SARS-CoV-2 among homeless people, asylum-seekers and other people living in precarious conditions in Marseille, France, March-April 2020                                        |
| Moe, Eriksen et al.                   | 2021 | SARS-CoV-2 serological findings and exposure risk among employees in school and retail after first and second wave COVID-19 pandemic in Oslo, Norway: a cohort study                         |
| Montague, Wiperman et al.             | 2021 | Anti-SARS-CoV-2 IgA Identifies Asymptomatic Infection in First Responders                                                                                                                    |
| Mora, Lewnard et al.                  | 2021 | Risk factors for SARS-CoV-2 infection among farmworkers in Monterey County, California                                                                                                       |
| Moradi, Mohamadi-Bolbanabad et al.    | 2021 | Seroepidemiology of COVID-19 in high-risk occupational groups in west of Iran, November 2020                                                                                                 |
| Mulligan, Berg et al.                 | 2021 | SARS-CoV-2 Seroprevalence Among Firefighters in Los Angeles, California                                                                                                                      |
| Murti, Achonu et al.                  | 2021 | COVID-19 Workplace Outbreaks by Industry Sector and Their Associated Household Transmission, Ontario, Canada, January to June, 2020                                                          |
| Mutambudzi, Niedzwiedz et al.         | 2021 | Occupation and risk of severe COVID-19: Prospective cohort study of 120 075 UK Biobank participants                                                                                          |

# Appendix A – Justification for full texts’ exclusion and excluded texts by reasons

|                          |      |                                                                                                                                                                                                                                                                                                                                                             |
|--------------------------|------|-------------------------------------------------------------------------------------------------------------------------------------------------------------------------------------------------------------------------------------------------------------------------------------------------------------------------------------------------------------|
| Pettifor, Diprete et al. | 2021 | A prospective study of asymptomatic SARS-CoV-2 infection among individuals involved in academic research under limited operations during the COVID-19 pandemic                                                                                                                                                                                              |
| Quashie, Mutungi et al.  | 2021 | Trends of SARS-CoV-2 antibody prevalence in selected regions across Ghana                                                                                                                                                                                                                                                                                   |
| Rao, Robinson et al.     | 2021 | Occupational exposures and mitigation strategies among homeless shelter workers at risk of COVID-19                                                                                                                                                                                                                                                         |
| Rowland, Bogulski et al. | 2021 | Experiences of Marshallese Food Processing Workers during the COVID-19 Pandemic                                                                                                                                                                                                                                                                             |
| Satpati, Sarangi et al.  | 2020 | Sero-surveillance (IgG) of SARS-CoV-2 among Asymptomatic General population of Paschim Medinipur District, West Bengal, India(Conducted during last week of July and 1st week of August 2020) - A Joint Venture of VRDL Lab (ICMR), Midnapore Medical College & Hospital & Department of Health and Family Welfare, Govt. of West Bengal, Paschim Medinipur |
| Thomas, Fina et al.      | 2021 | Social, demographic and behavioural determinants of SARS-CoV-2 infection: A case-control study carried out during mass community testing of asymptomatic individuals in South Wales, December 2020                                                                                                                                                          |
| Toniato, Avolio et al.   | 2021 | Evaluation of IgG seroprevalence of the Sars-Cov-2 in different worker categories                                                                                                                                                                                                                                                                           |
| Zaidi, Rizwan et al.     | 2021 | Seroprevalence of anti-SARS-CoV-2 antibodies in residents of Karachi-challenges in acquiring herd immunity for COVID 19                                                                                                                                                                                                                                     |
| Zell, Wisniewski et al.  | 2021 | Associations of SARS-CoV-2 serum IgG with occupation and demographics of military personnel                                                                                                                                                                                                                                                                 |

## A.2.9 else

| authors                      | ye   | title                                                                                                                                                     |
|------------------------------|------|-----------------------------------------------------------------------------------------------------------------------------------------------------------|
| Al-Kuwari, Al-Nuaimi et al.  | 2021 | COVID-19 infection across workplace settings in Qatar: a comparison of COVID-19 positivity rates of screened workers from March 1st until July 31st, 2020 |
| Allan-Blitz et al.           | 2021 | Characteristics of SARS-CoV-2 Positive Individuals in California From Two Periods During Notable Decline in Incident Infection                            |
| Allan-Blitz, Hertlein et al. | 2021 | Heterogeneity in SARS-CoV-2 Positivity by Ethnicity in Los Angeles                                                                                        |
| Brune, Korth et al.          | 2021 | [SARS-CoV-2 IgG seroprevalence in personnel of the extraclinical fight against the COVID-19 pandemic]                                                     |
| Buchan, Smith et al.         | 2021 | Incidence of outbreak-associated COVID-19 cases by industry in Ontario, Canada, April 1, 2020-March 31, 2021                                              |
| de Gier et al.               | 2021 | Occupation- and age-associated risk of SARS-CoV-2 test positivity, the Netherlands, June to October 2020                                                  |
| Kjøllesdal and Magnusson     | 2021 | Occupational risk of COVID-19 by country of birth. A register-based study                                                                                 |
| Pasco, Fox et al.            | 2020 | Estimated Association of Construction Work with Risks of COVID-19 Infection and Hospitalization in Texas                                                  |

**Appendix A – GRADE****A.3 GRADE**

|                   | rating | description                                                                                  | comment                                   |
|-------------------|--------|----------------------------------------------------------------------------------------------|-------------------------------------------|
| <b>Downgrades</b> |        |                                                                                              |                                           |
| Risk of bias      | -1     | In subgroup analysis, the result of high risk studies differs from those of low risk studies |                                           |
|                   | -1     | Only high risk studies form the basis of the result                                          |                                           |
| Inconsistency     | -1     |                                                                                              |                                           |
| Indirectness      | -1     |                                                                                              | Did not apply in this review              |
| Imprecision       | -1     | CI includes 1                                                                                | Hazard identification;<br>Risk assessment |
|                   | -1     | RR CI-range > 2                                                                              | Risk assessment                           |
|                   | -2     | CI includes 1 <u>and</u> RR CI-range > 2                                                     |                                           |
| Publication bias  | -1     |                                                                                              | Did not apply in this review              |

|                  |    |                     |                              |
|------------------|----|---------------------|------------------------------|
| <b>Upgrades</b>  |    |                     |                              |
| Effect size      | +1 | $2 \leq RR < 5$     |                              |
|                  | +1 | $0,2 < RR \leq 0,5$ |                              |
|                  | +2 | $RR \geq 5$         |                              |
|                  | +2 | $RR \leq 0,2$       |                              |
| Dose-response    | +1 |                     | Did not apply in this review |
| Under-estimation | +1 |                     | Did not occur in this review |

## A.4 Individual results' graphs

## A.4.1 2923 – occupations in meat processing

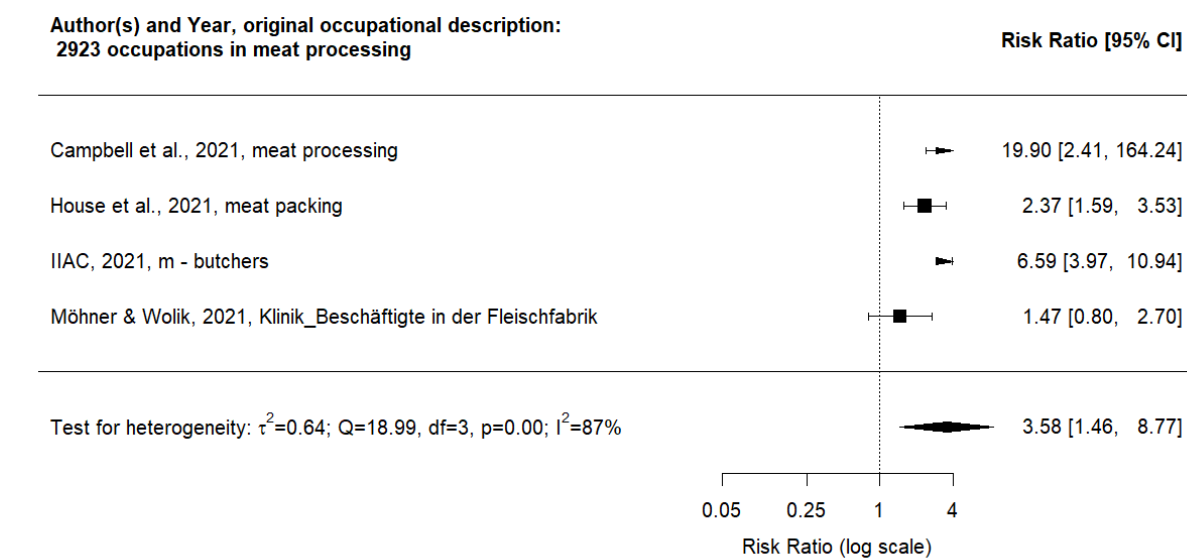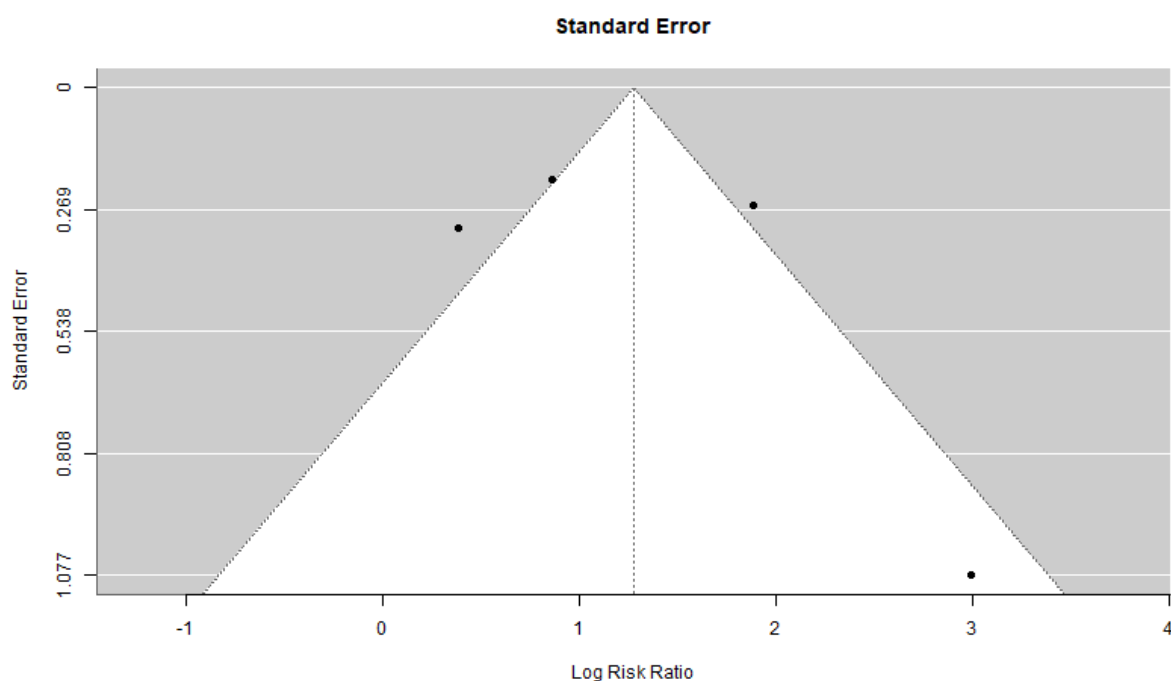

A.4.2 2930 – cooks (without specification)

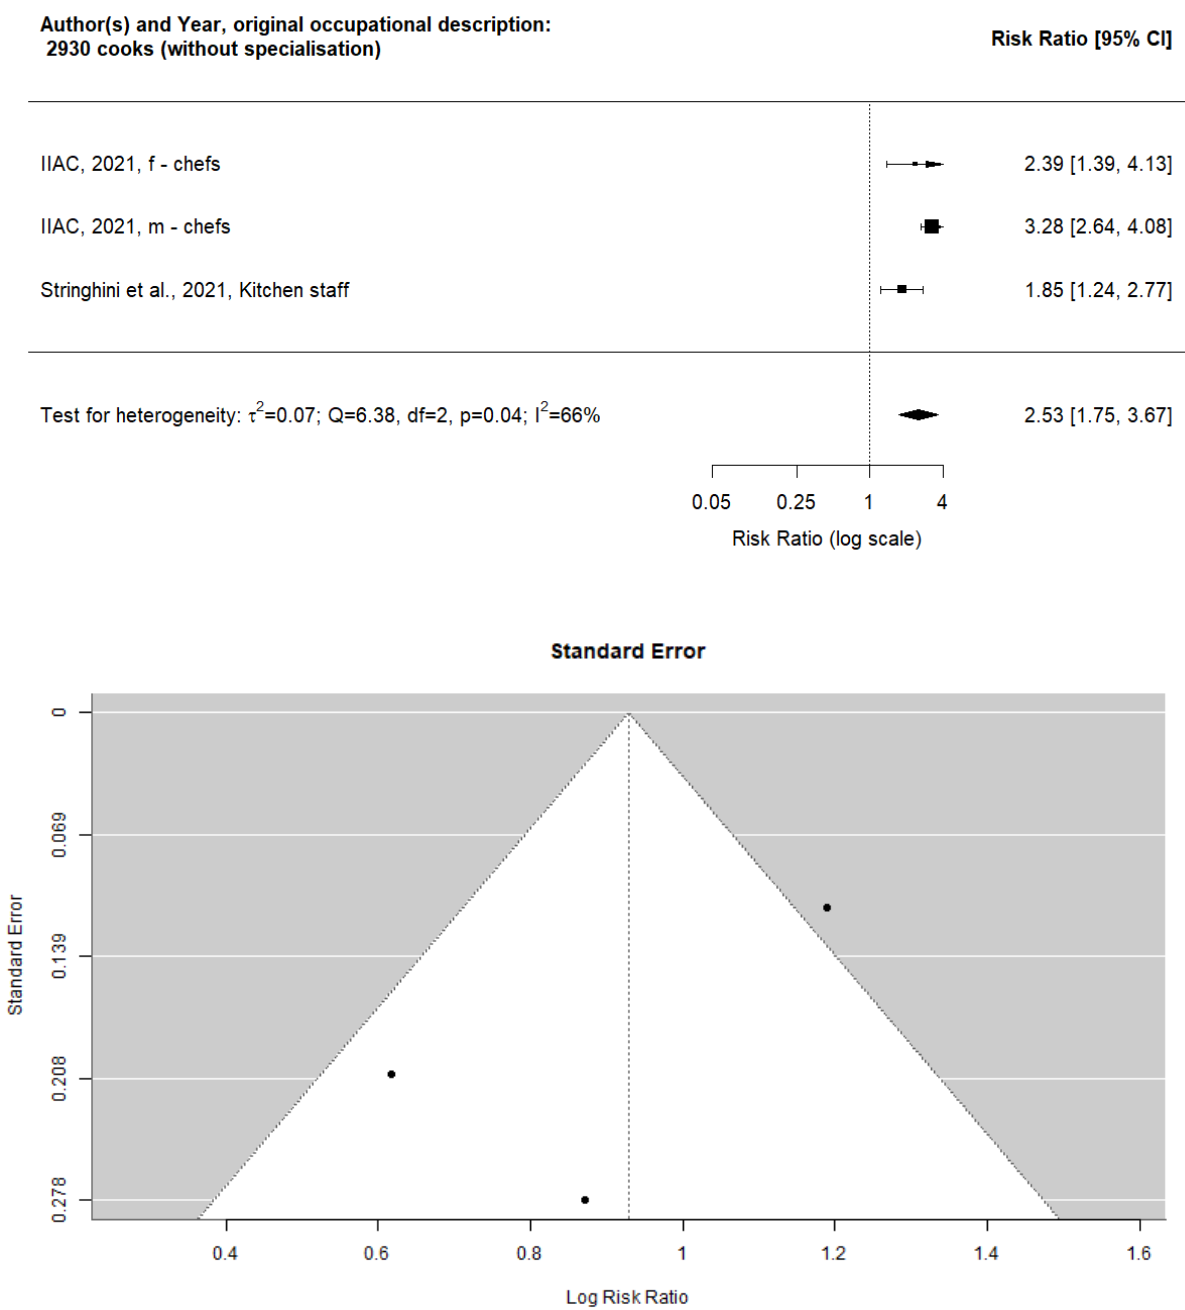

**Appendix A – Individual results' graphs**

**A.4.3 5133 – occupations in cargo-handling**

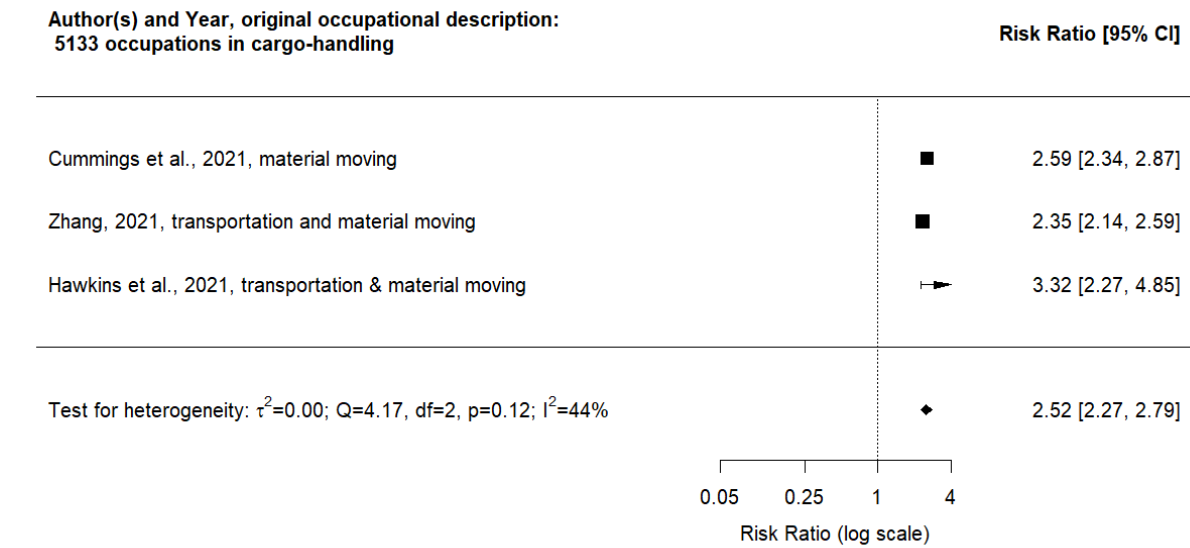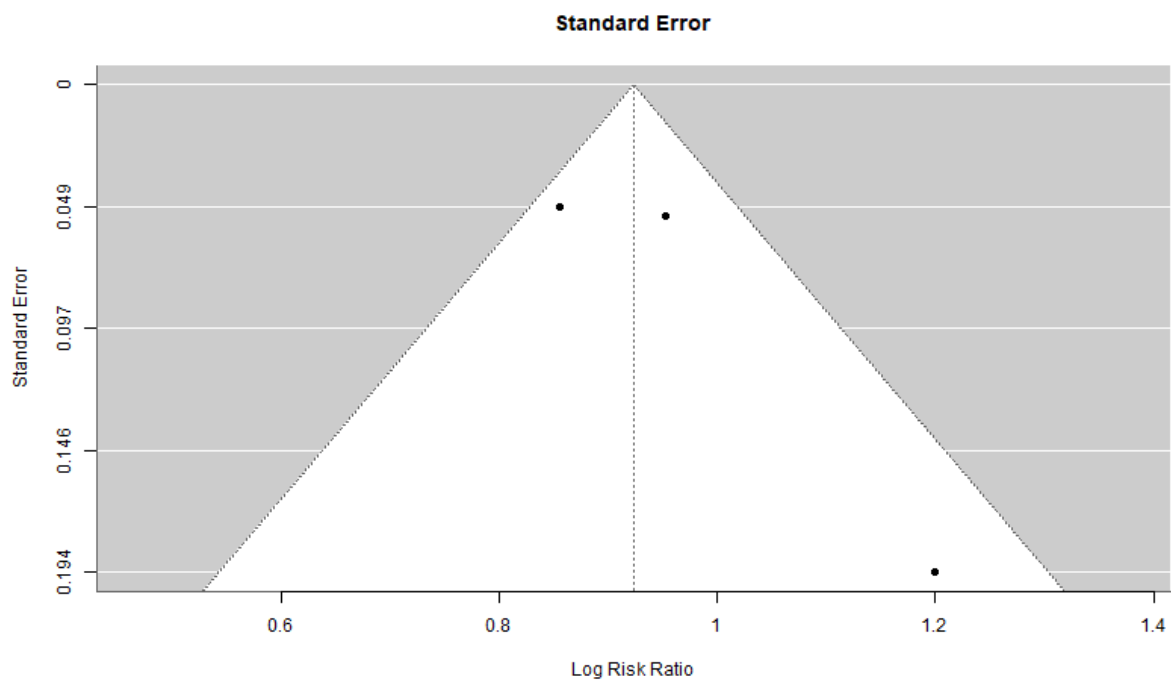

**Appendix A – Individual results' graphs**

**A.4.4 5211 – professional drivers (passenger transport)**

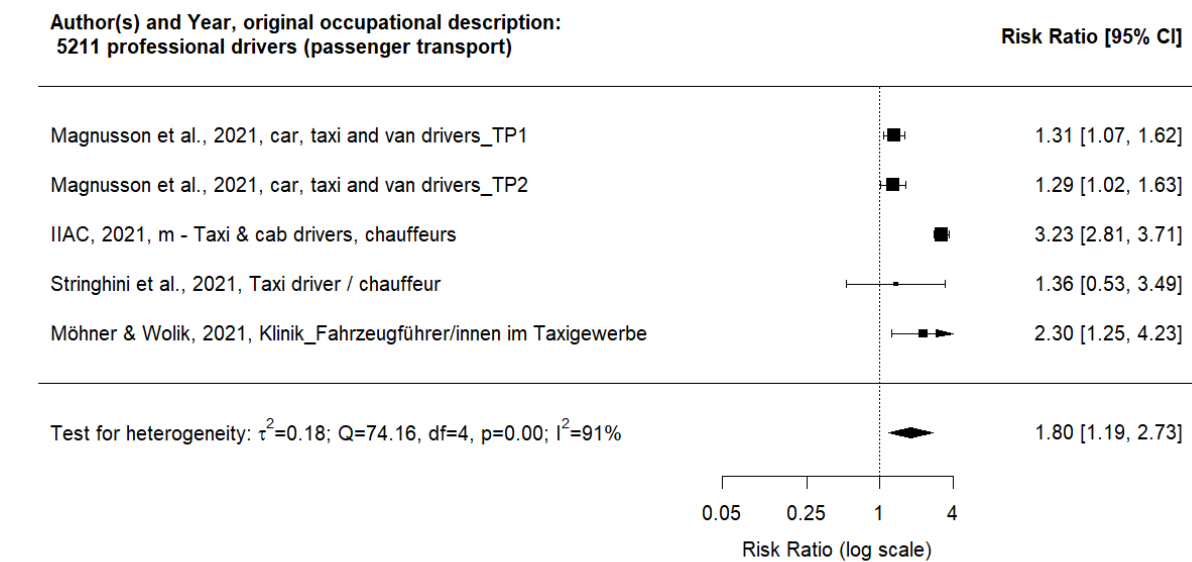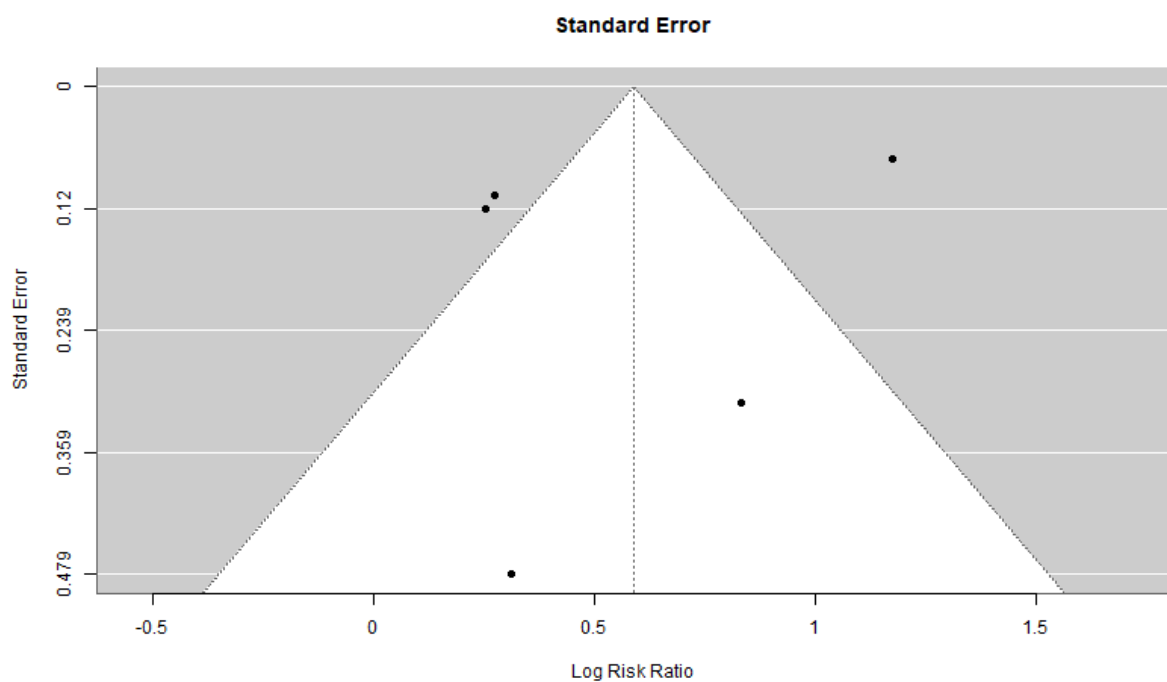

**Appendix A – Individual results' graphs****A.4.5 5213 – bus and tram drivers**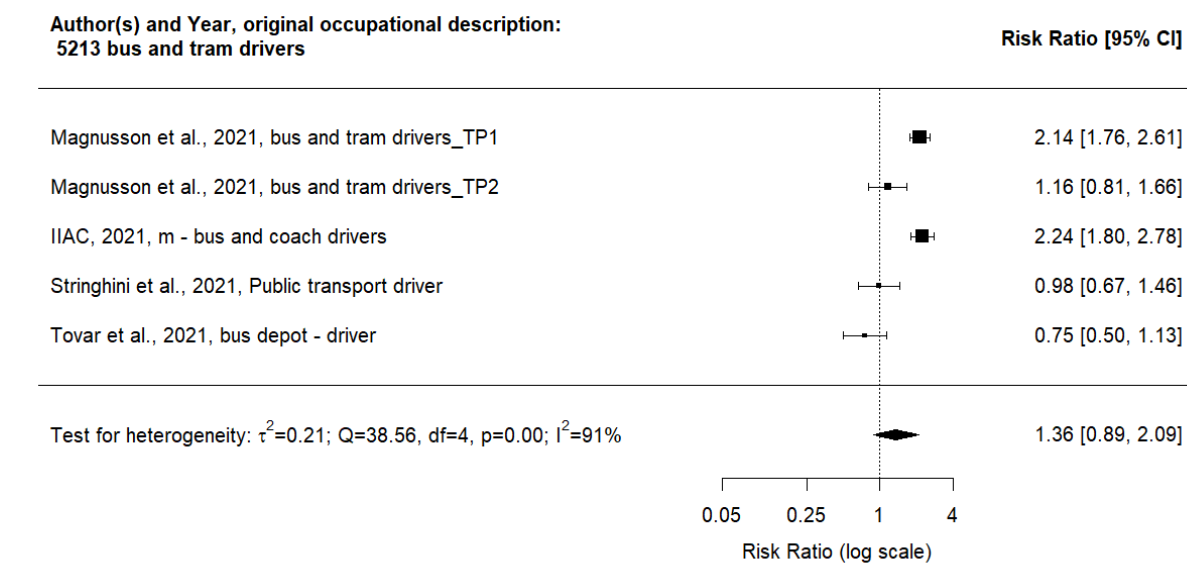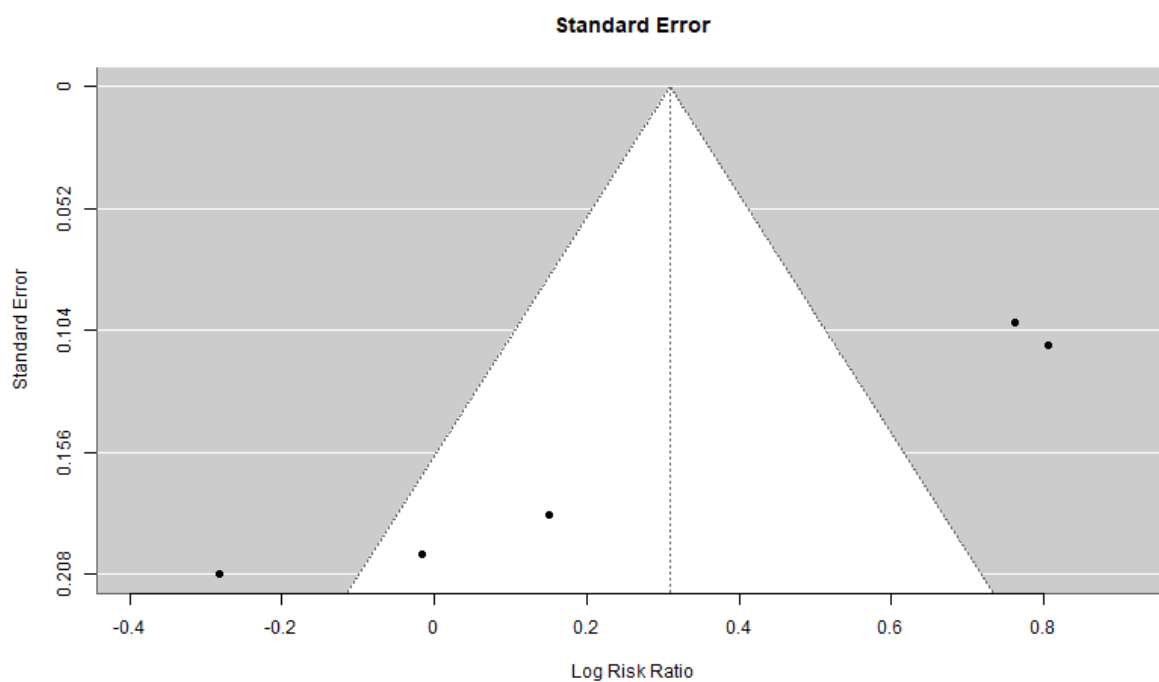



**Appendix A – Individual results' graphs****A.4.6 5311 – occupations in physical security, protection of valuables**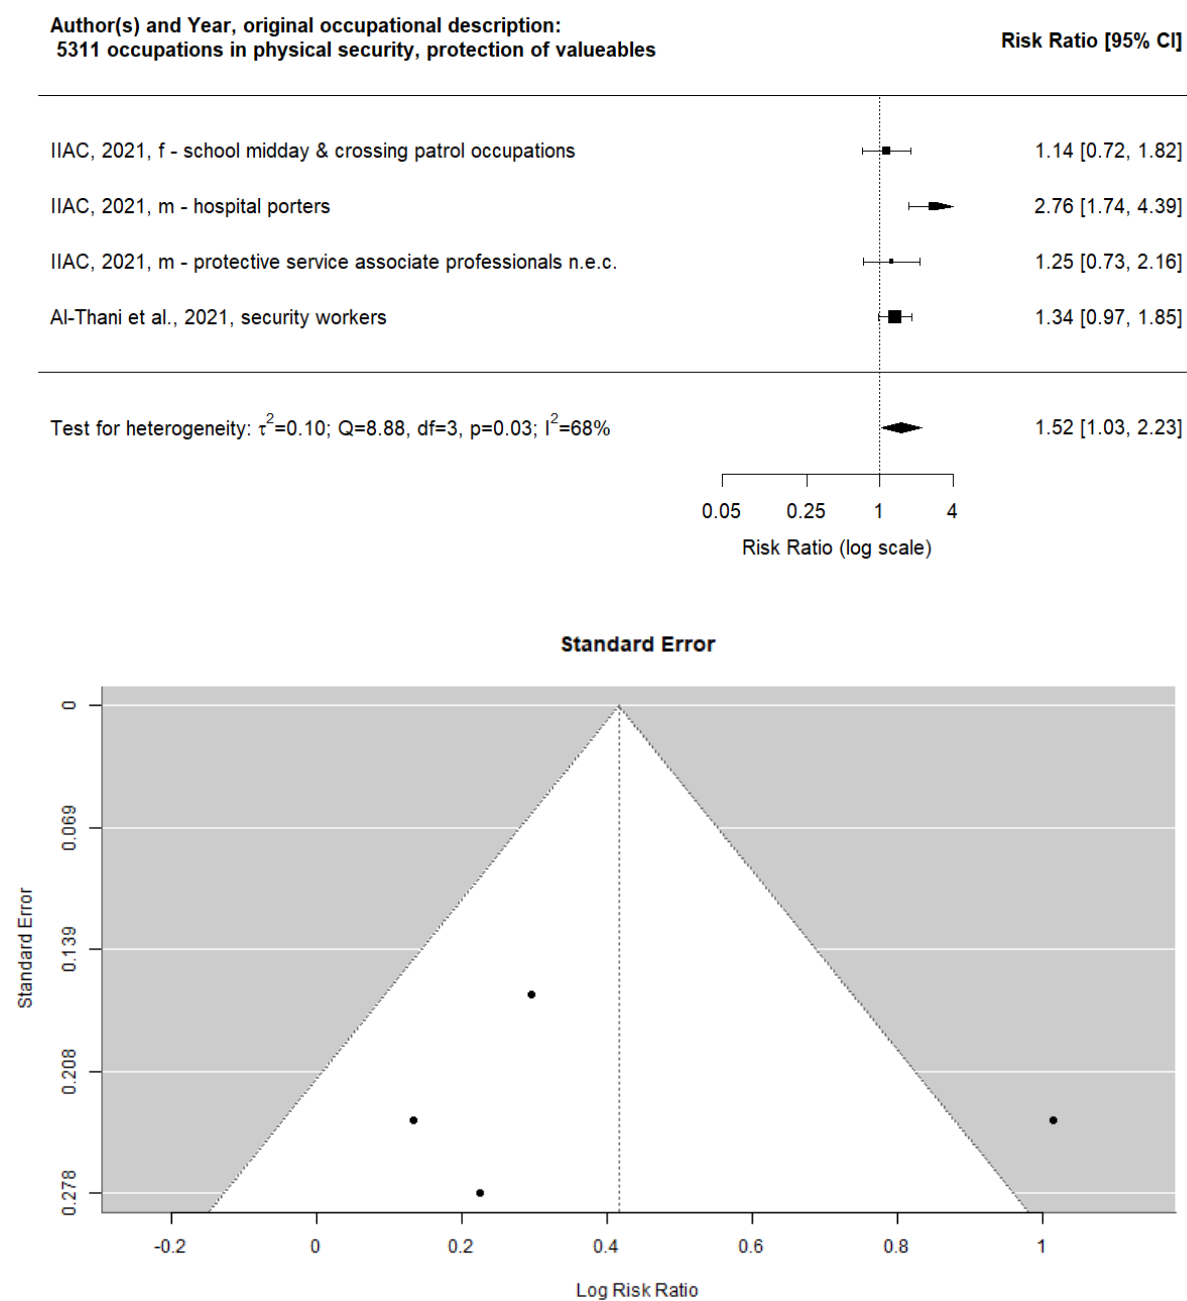

**Appendix A – Individual results' graphs**

**A.4.7 5318 – occupations in physical security, personal protection, fire protection and workplace safety**

**Author(s) and Year, original occupational description:**

**5318 occupations in physical security, personal protection, fire protection and workplace safety**

**Risk Ratio [95% CI]**

|                                           |                                                                                     |                   |
|-------------------------------------------|-------------------------------------------------------------------------------------|-------------------|
| Cummings et al., 2021, protective service |  | 1.47 [1.27, 1.70] |
| Zhang, 2021, protective service           |  | 1.96 [1.69, 2.27] |
| Hawkins et al., 2021, protective service  |  | 1.85 [1.02, 3.37] |
| IIAC, 2021, m - Security guards & related |  | 3.21 [2.71, 3.79] |
| Stringhini et al., 2021, Security guard   |  | 1.31 [0.85, 2.01] |

Test for heterogeneity:  $\tau^2=0.11$ ;  $Q=51.38$ ,  $df=4$ ,  $p=0.00$ ;  $I^2=91\%$

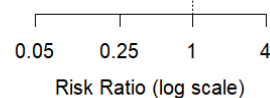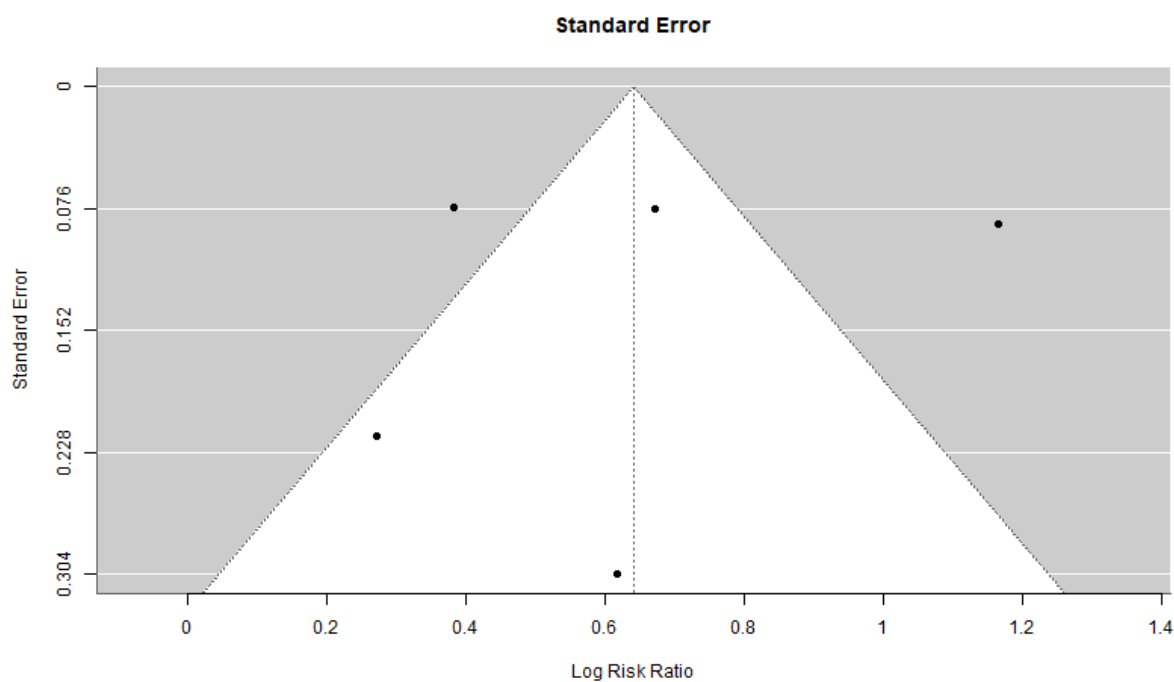

A.4.8 5321 – uniformed police personnel

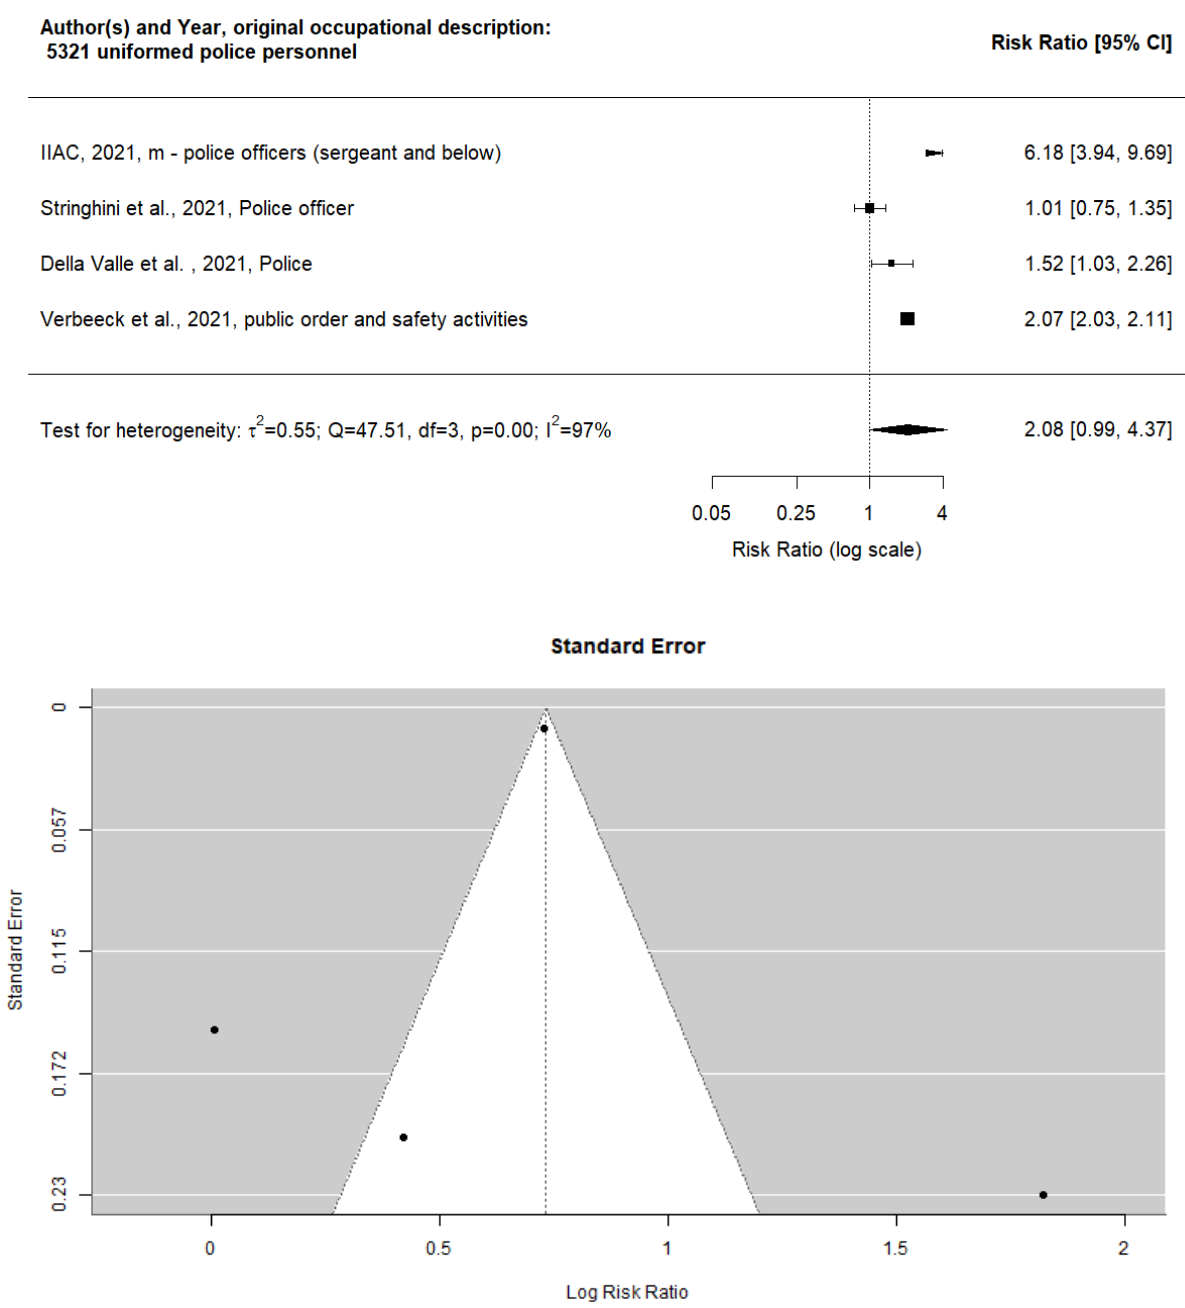

A.4.9 5411 – occupations in building cleaning services

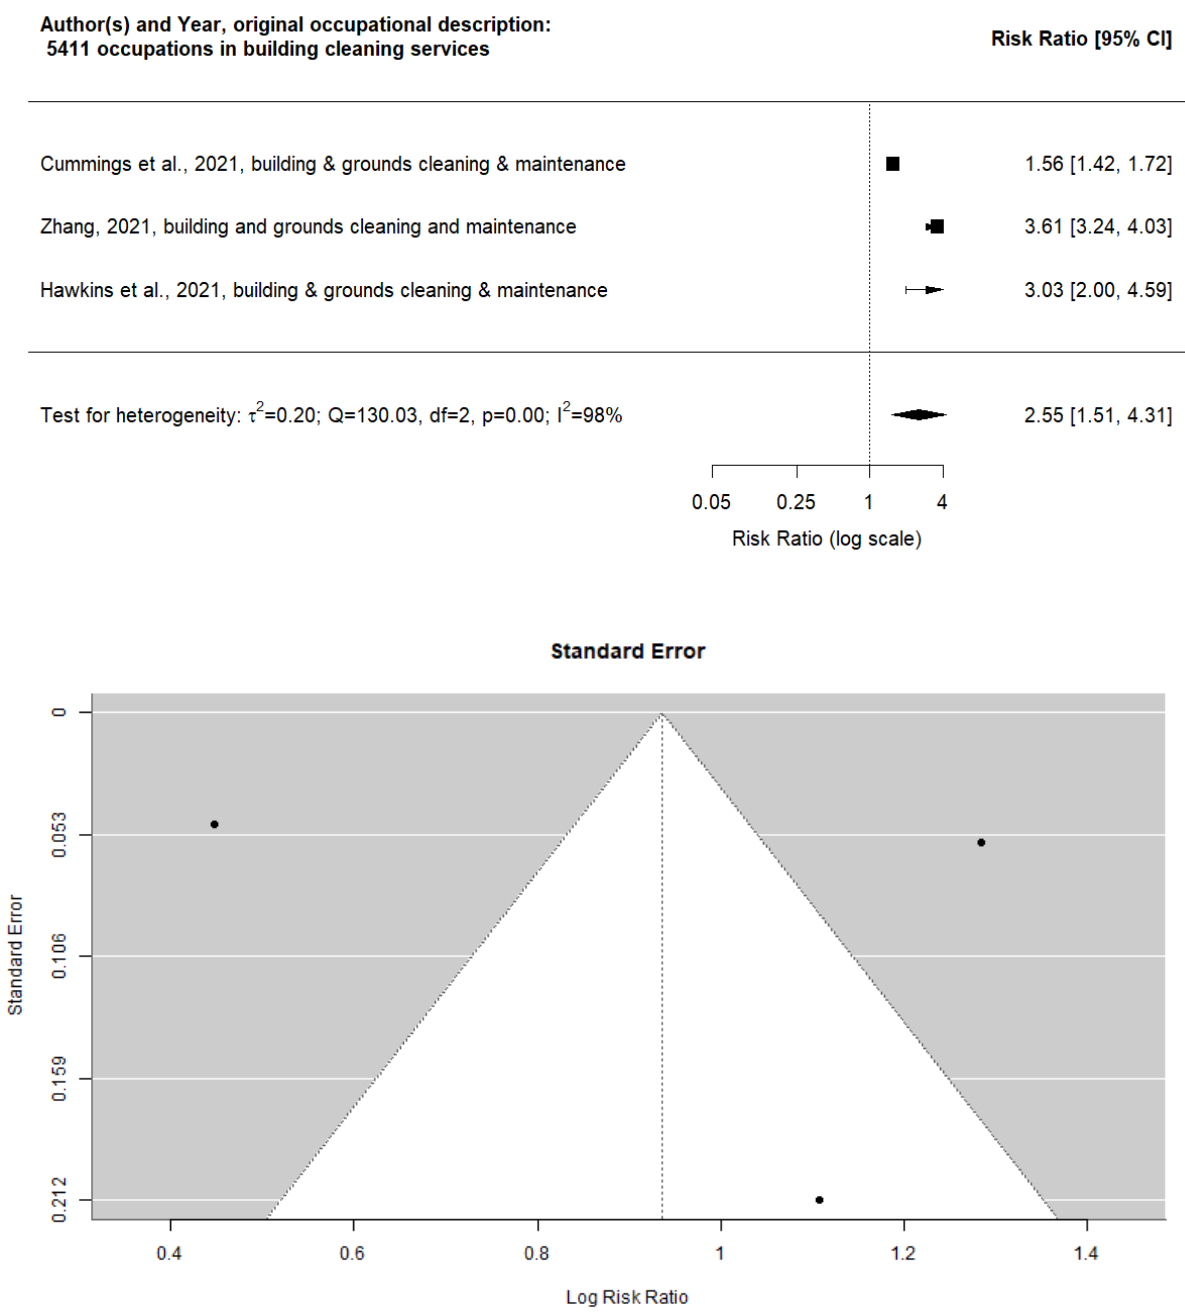

A.4.10 6132 – occupations in facility management

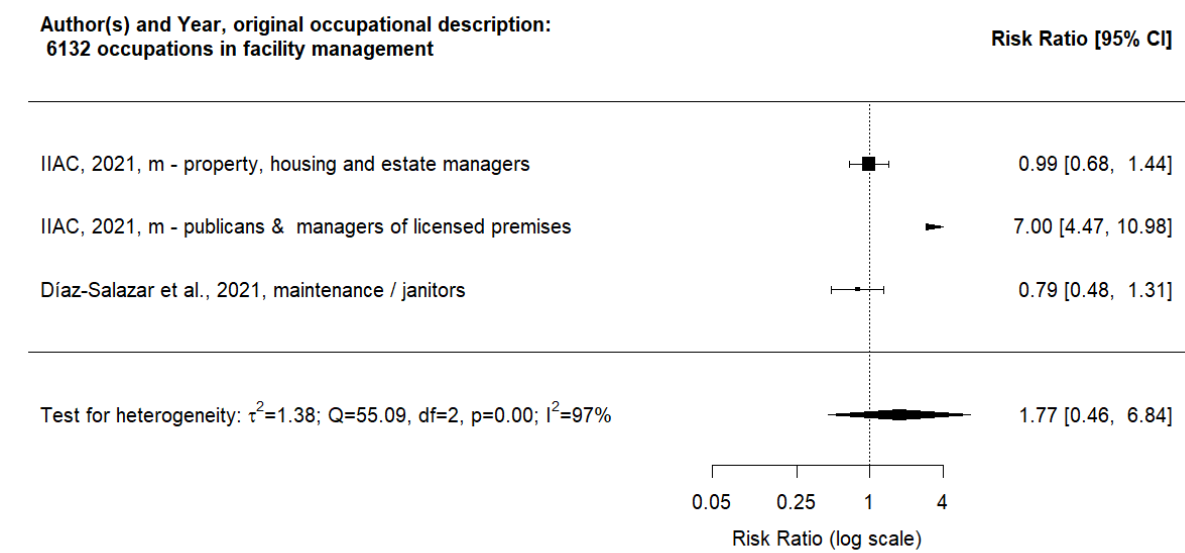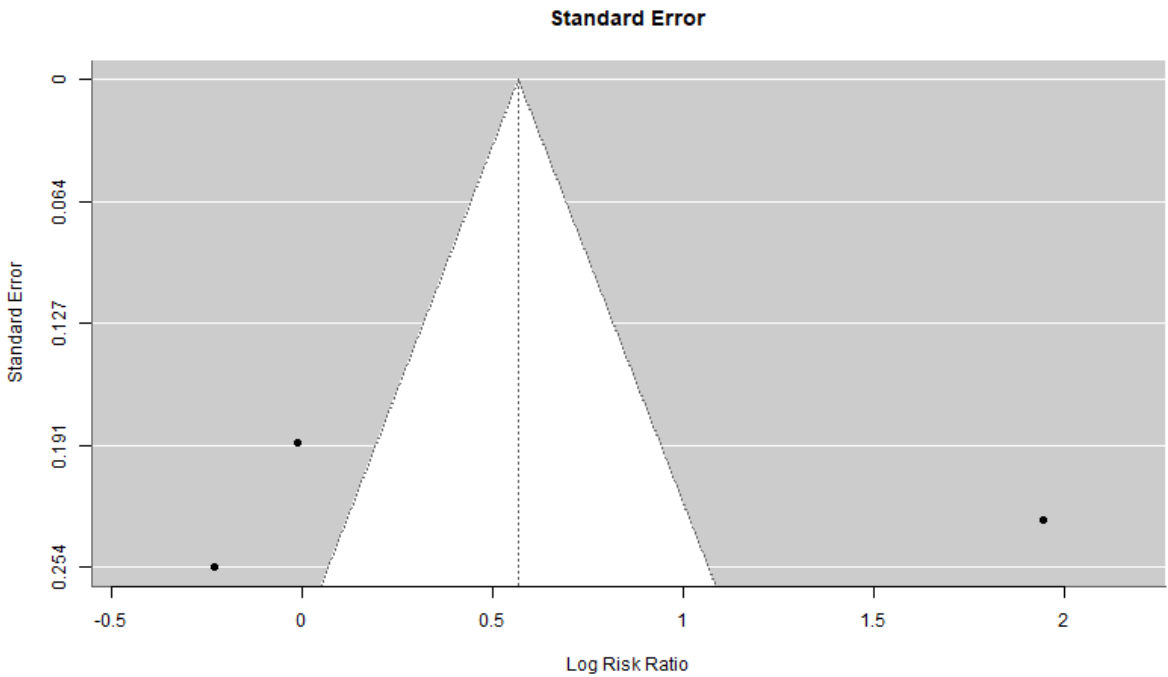

## Appendix A – Individual results' graphs

## A.4.11 6210 – sales occupations in retail trade (without product specialisation)

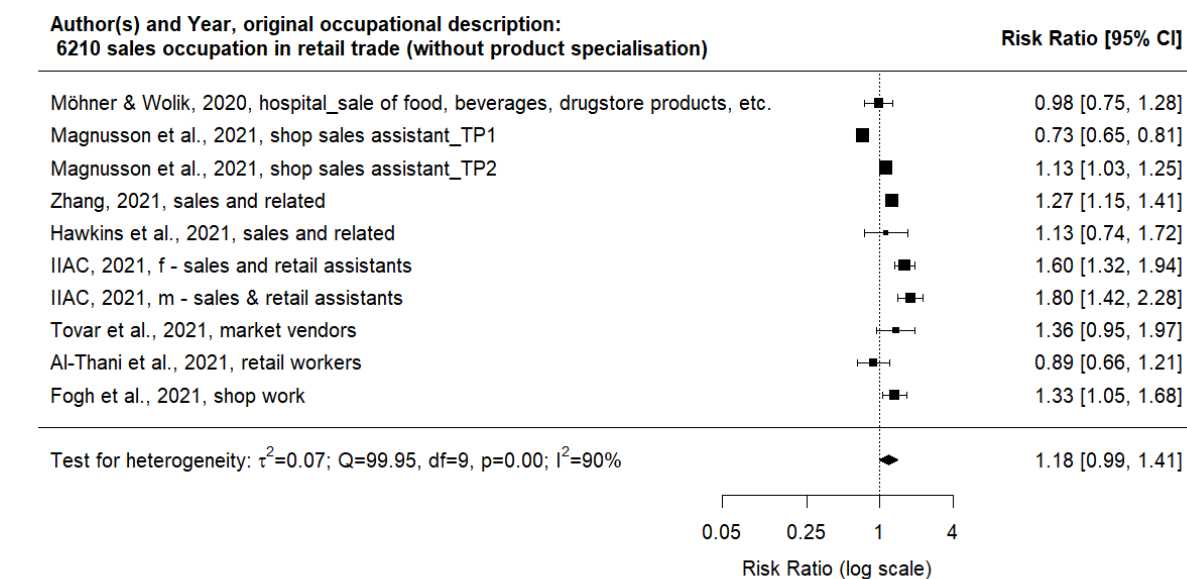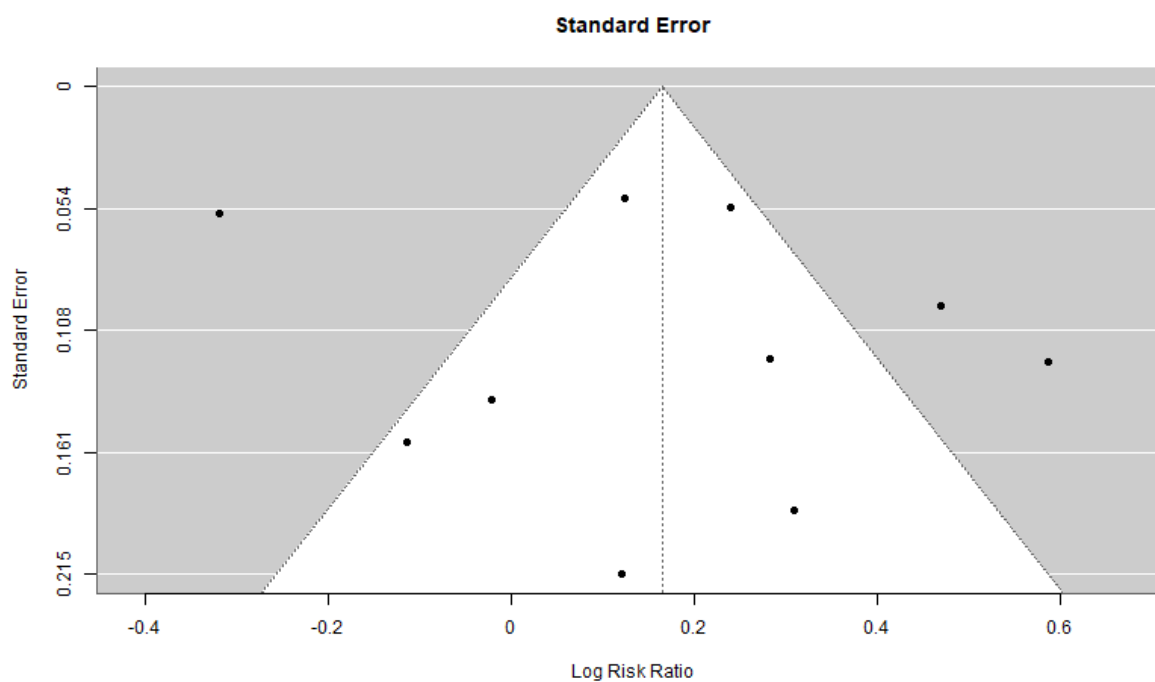

**Appendix A – Individual results' graphs****A.4.12 6211 – cashiers and ticket agents**

**Author(s) and Year, original occupational description:  
6211 cashiers and ticket agents**

**Risk Ratio [95% CI]**

|                                                       |                   |
|-------------------------------------------------------|-------------------|
| IIAC, 2021, f - retail cashiers & check-out operators | 0.93 [0.56, 1.55] |
| IIAC, 2021, m - retail cashiers & check out operators | 1.96 [1.09, 3.54] |
| Poustchi et al., 2021, cashiers of supermarket chains | 1.04 [0.86, 1.26] |
| Stringhini et al., 2021, Cashier                      | 0.97 [0.54, 1.75] |

Test for heterogeneity:  $\tau^2=0.00$ ;  $Q=4.47$ ,  $df=3$ ,  $p=0.21$ ;  $I^2=0\%$

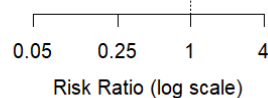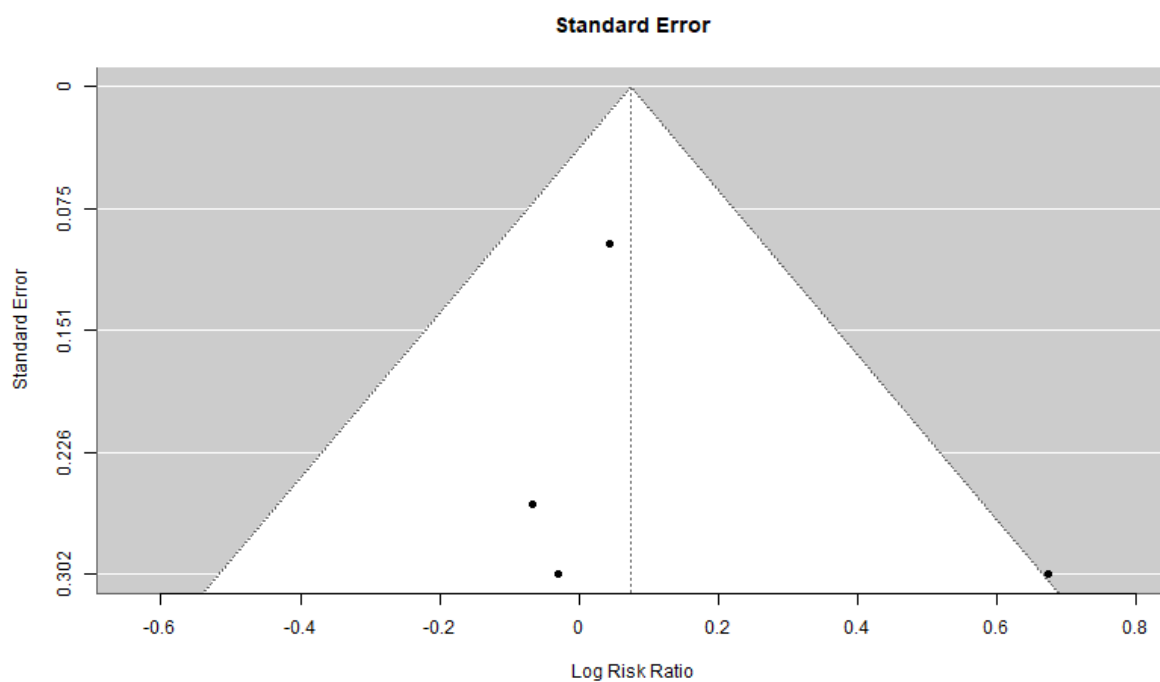

**A.4.13 6230 – sales occupations (retail) selling foodstuffs (without specialisation)**

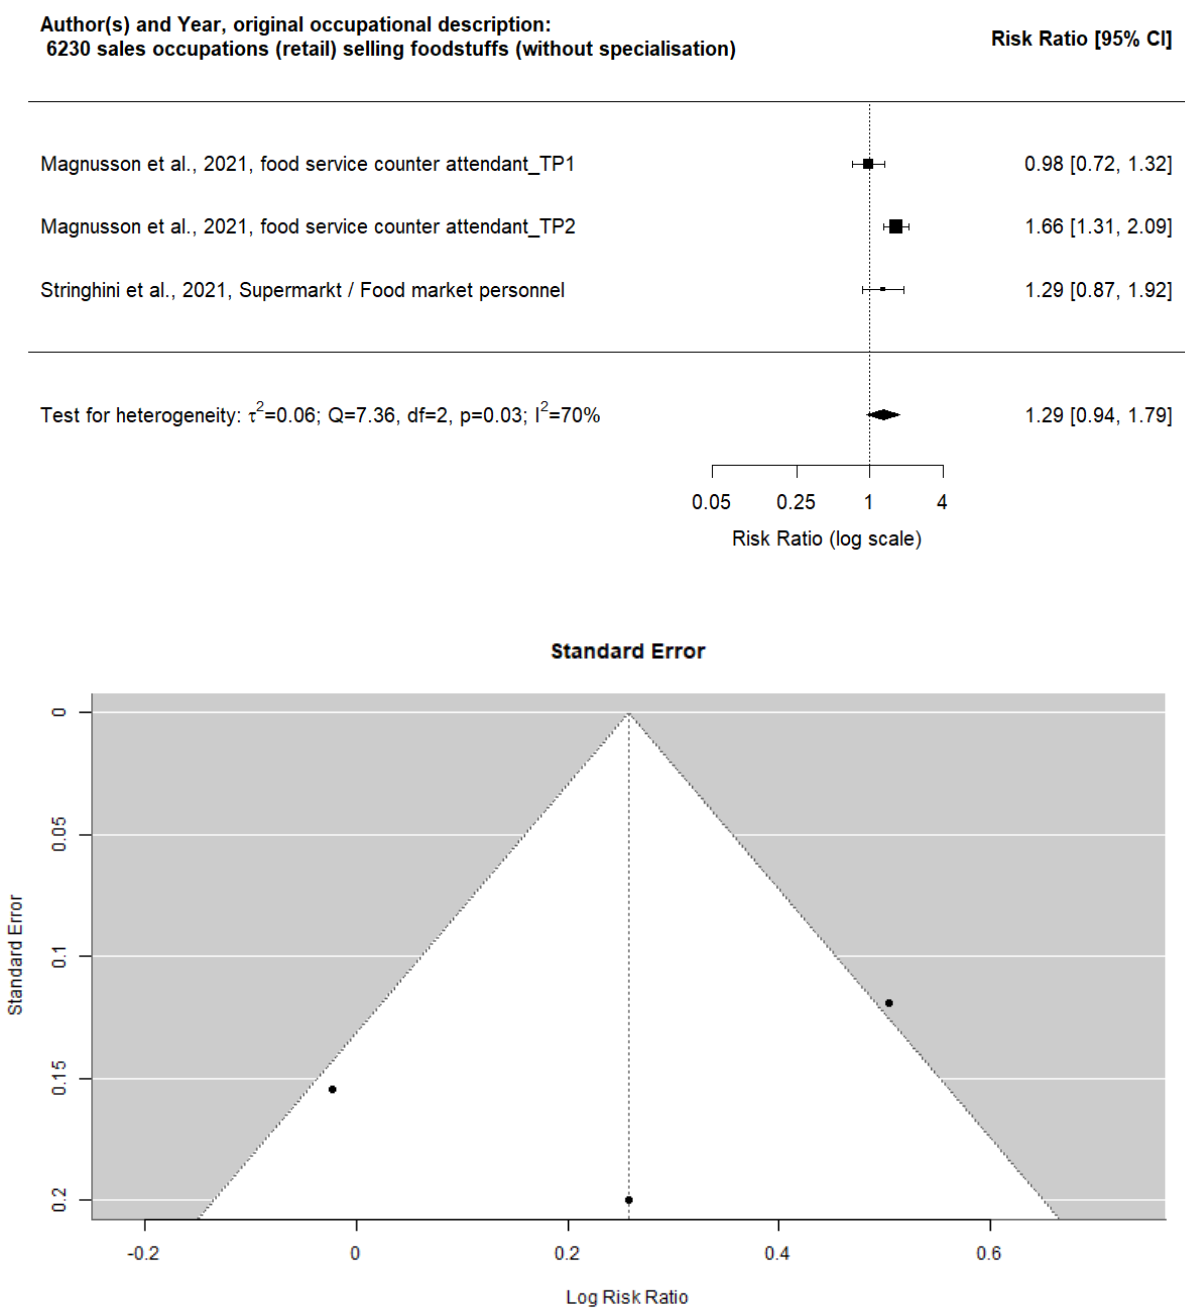



## Appendix A – Individual results' graphs

## A.4.14 6330 – gastronomy occupations (without specialisation)

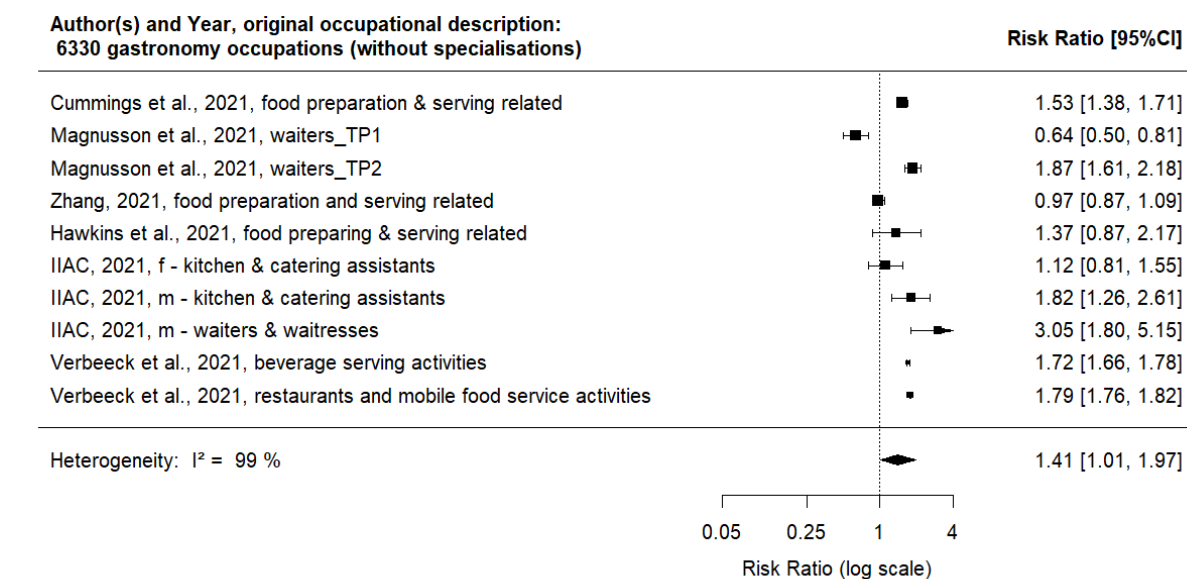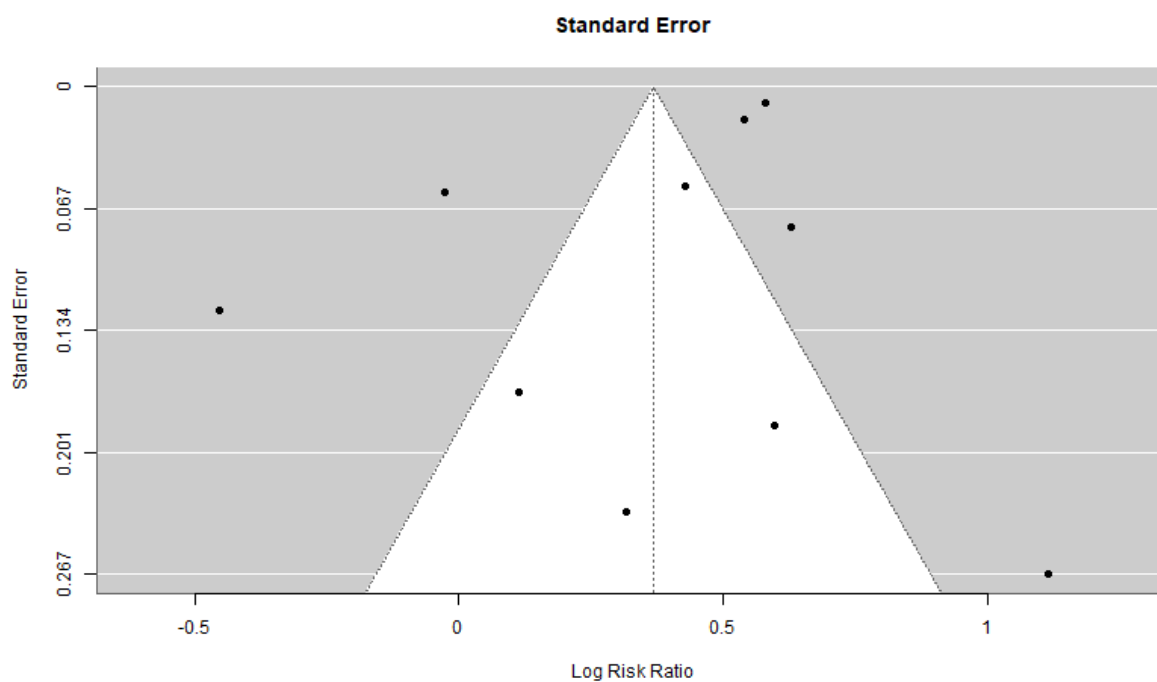

A.4.15 7110 – managing directors and executive board members

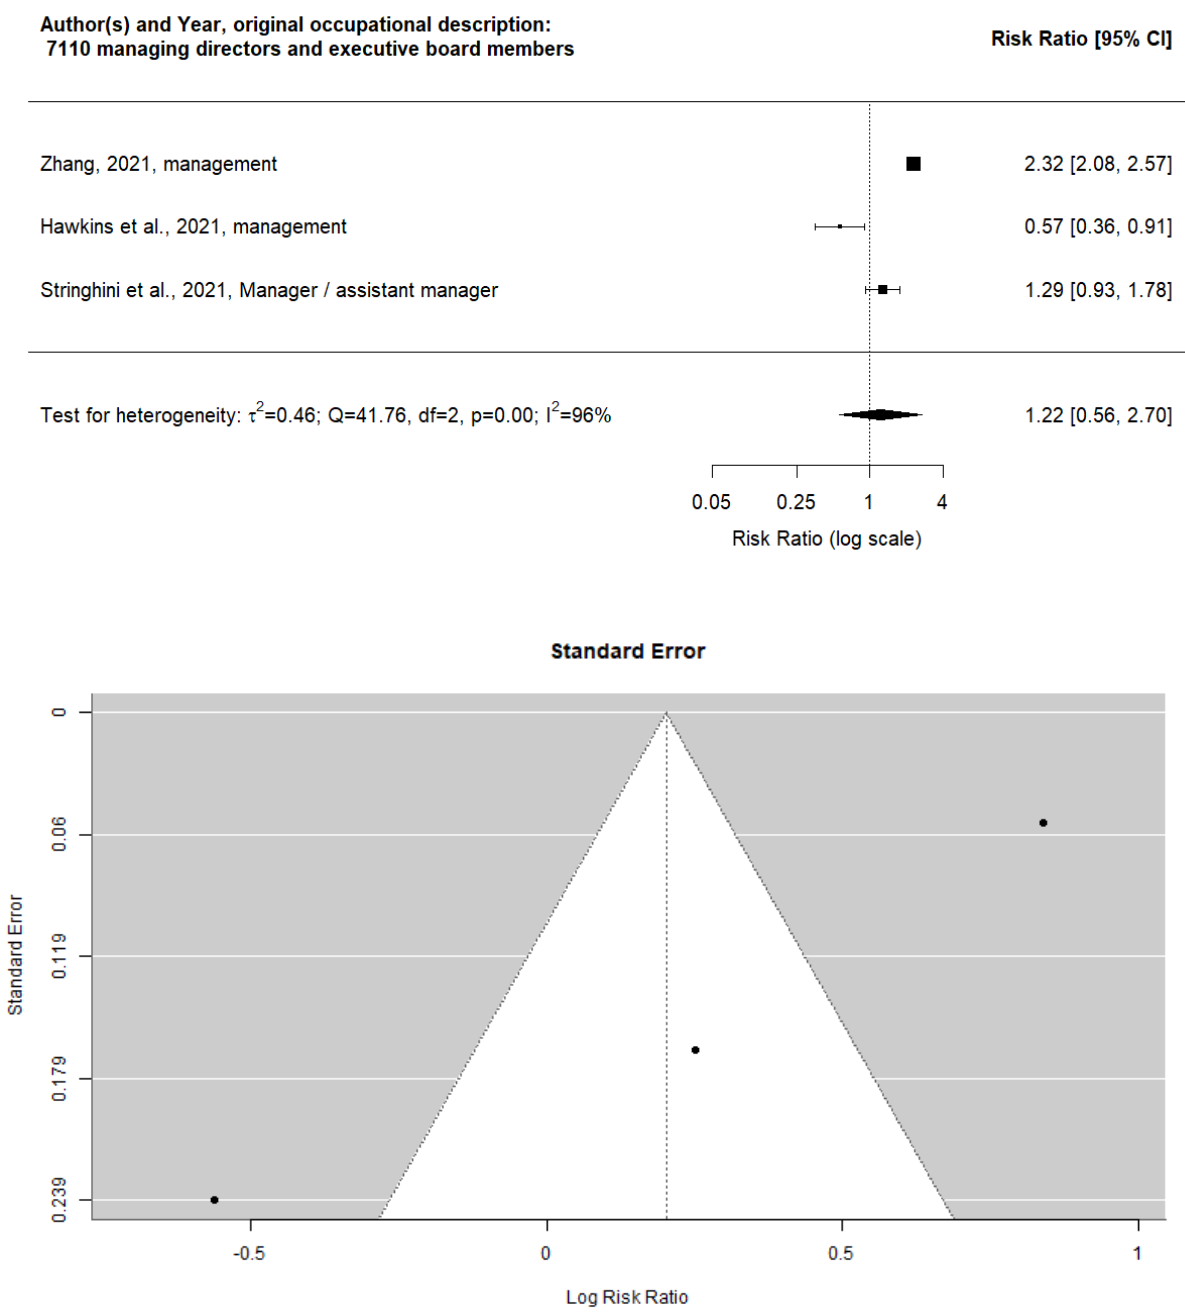

**Appendix A – Individual results' graphs****A.4.16 7211 – bankers**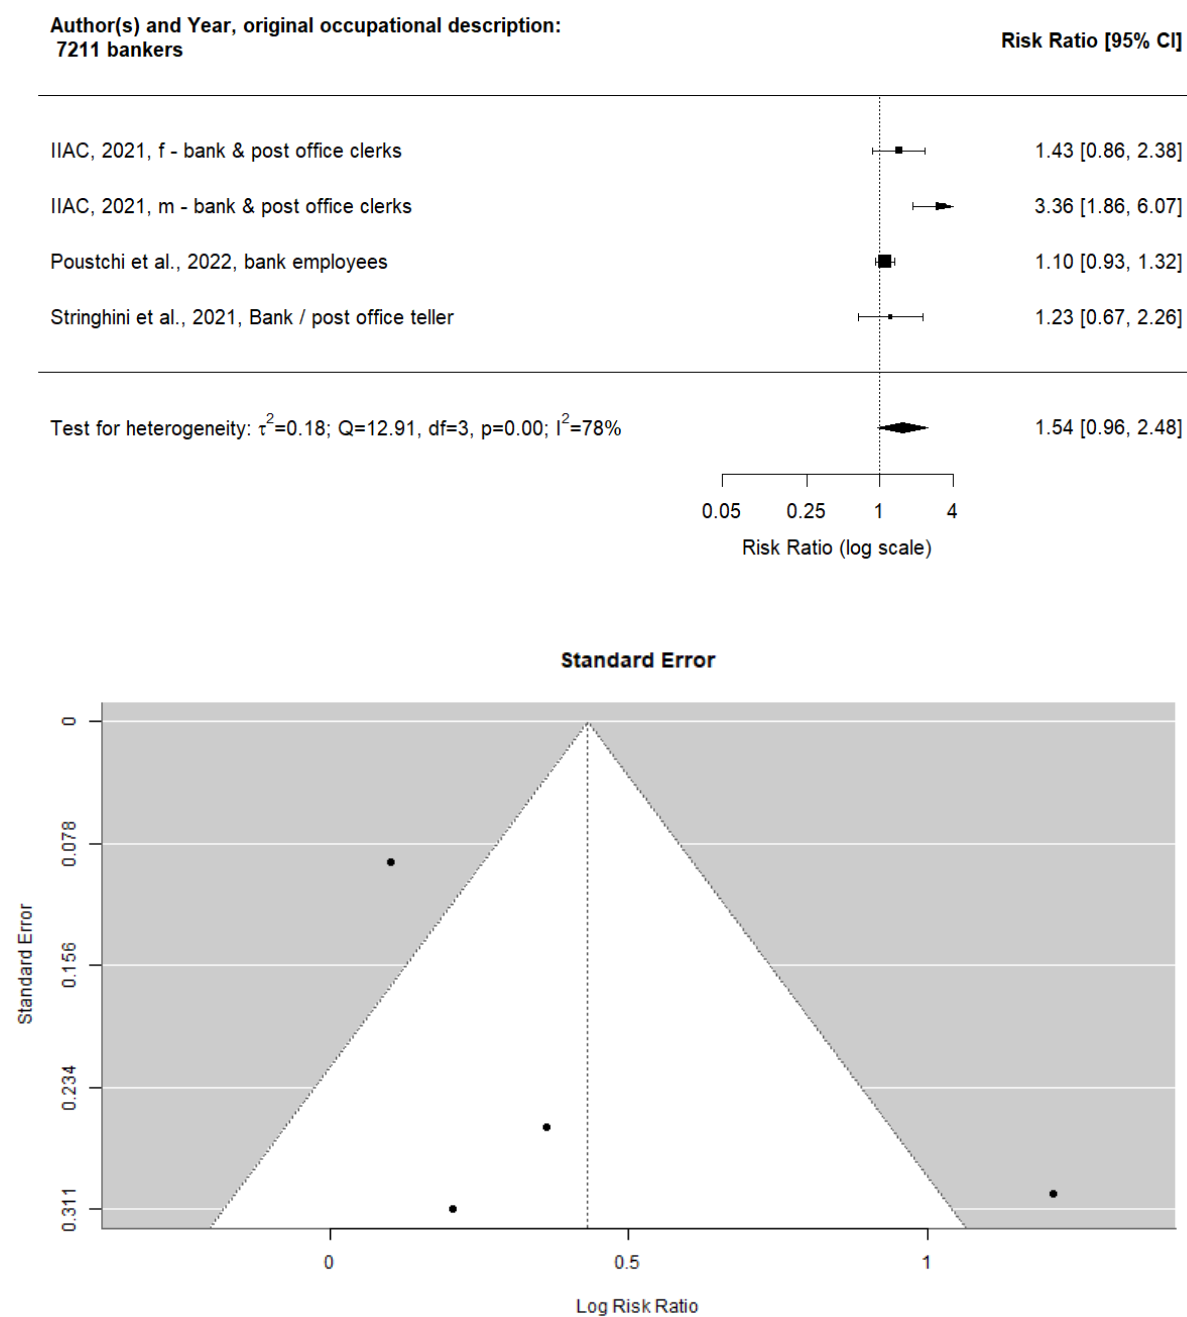

A.4.17 7221 – occupations in accounting

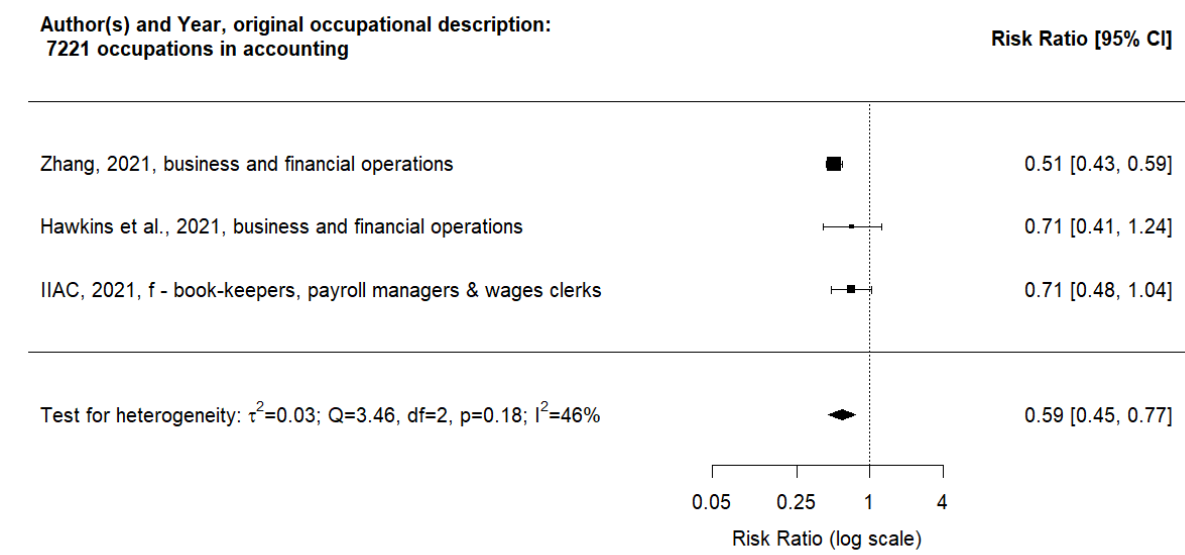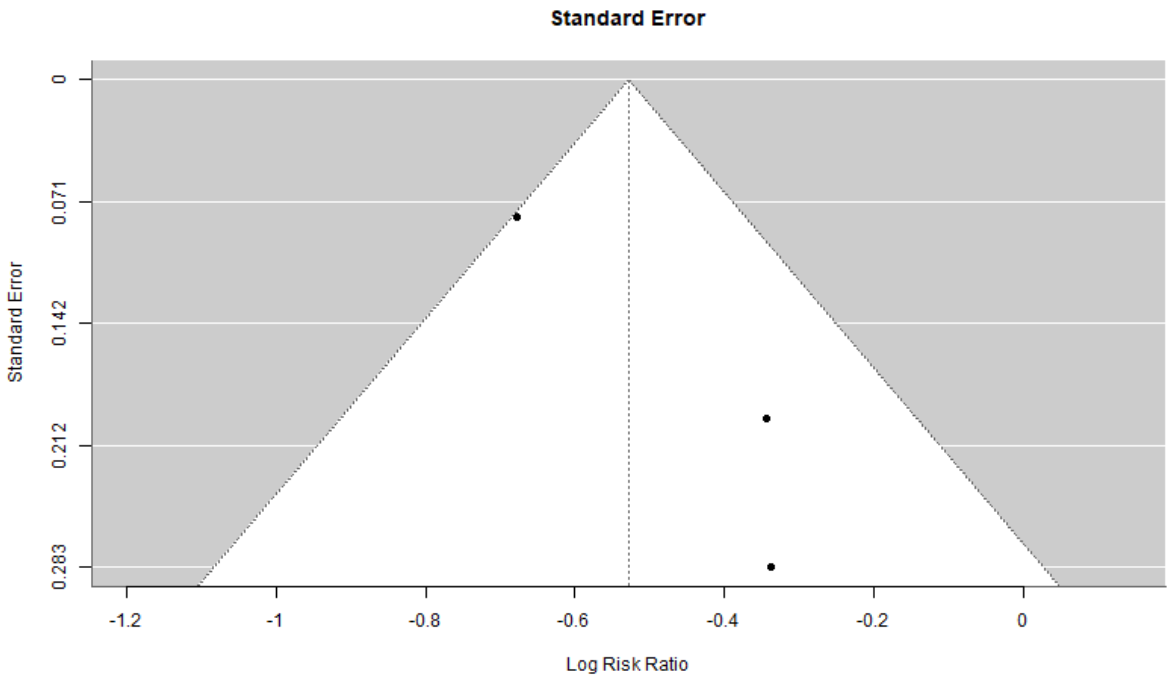

## Appendix A – Individual results' graphs

## A.4.18 8311 – occupations in child care and child-rearing

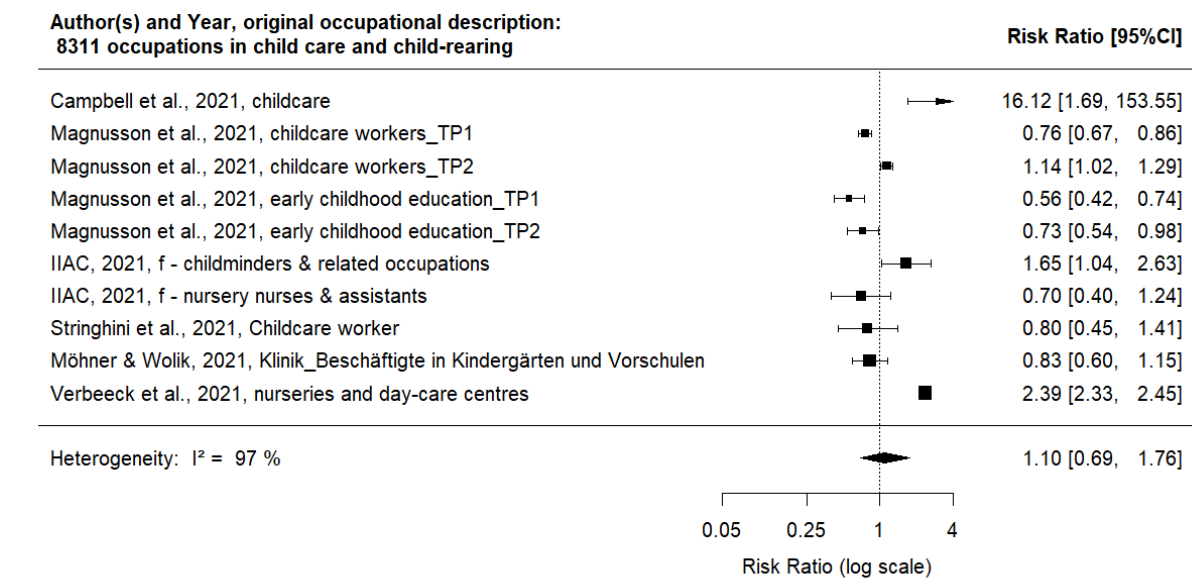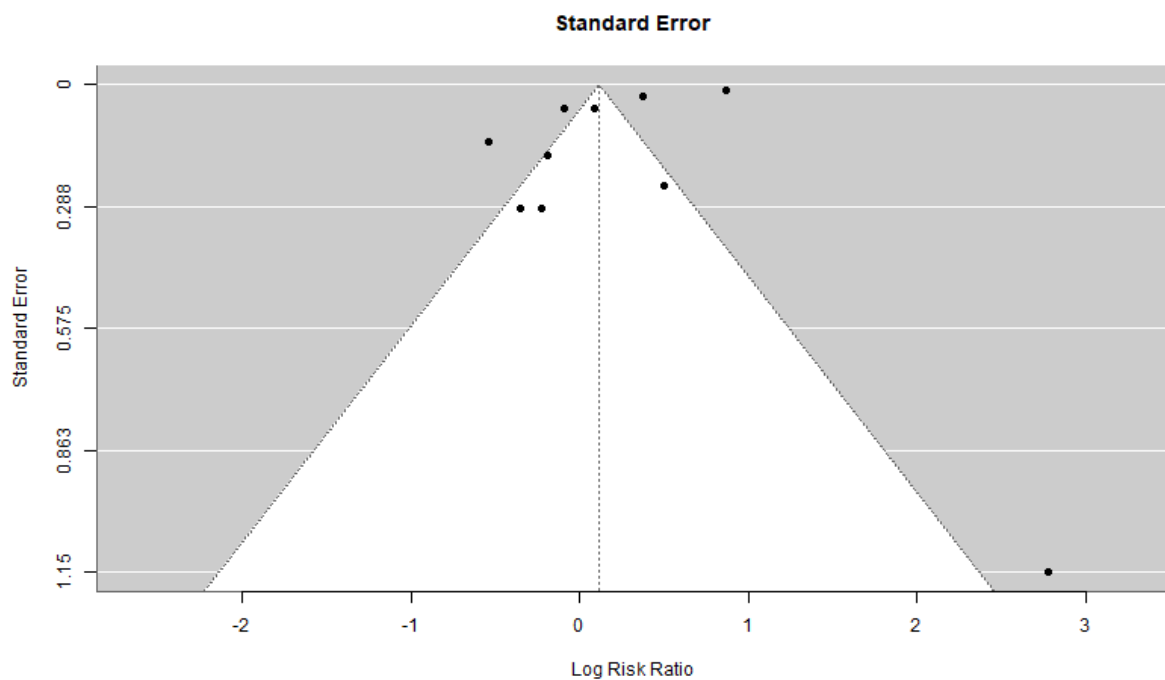

#### A.4.19 8312 – occupations in social work and social pedagogics

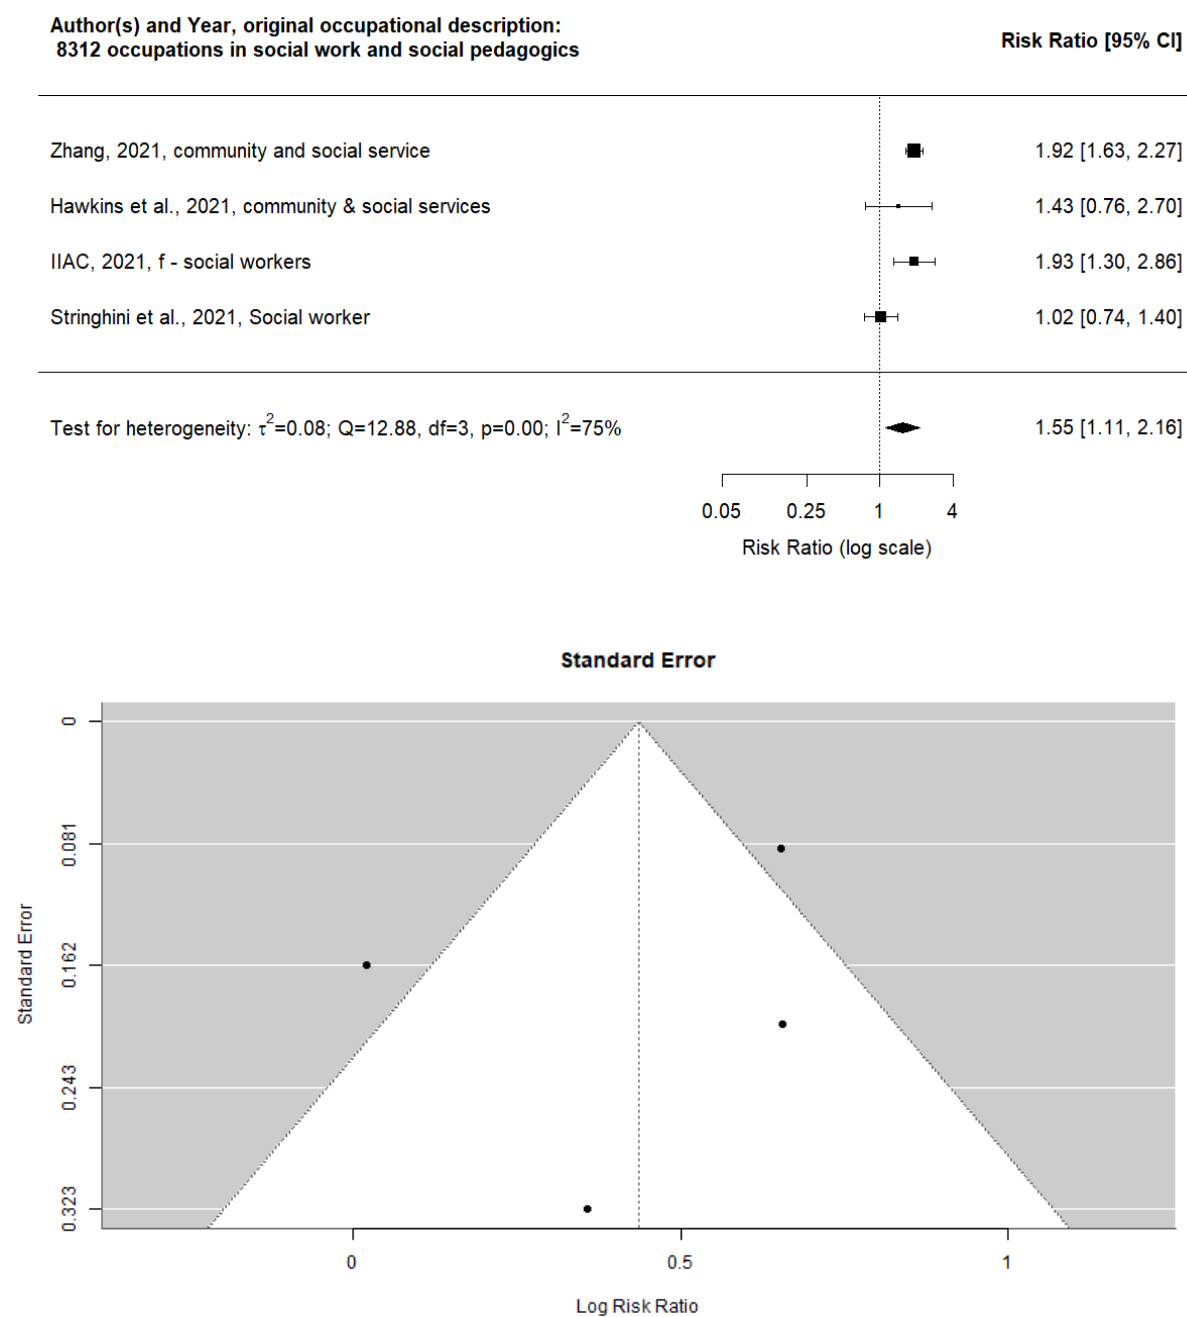

A.4.20 8411 – teachers in primary education

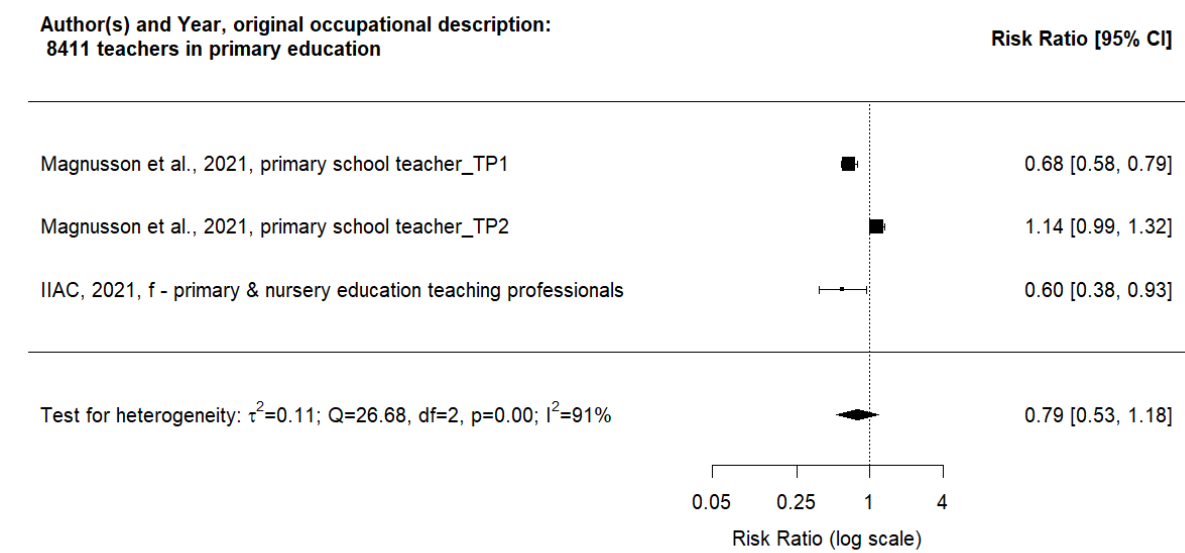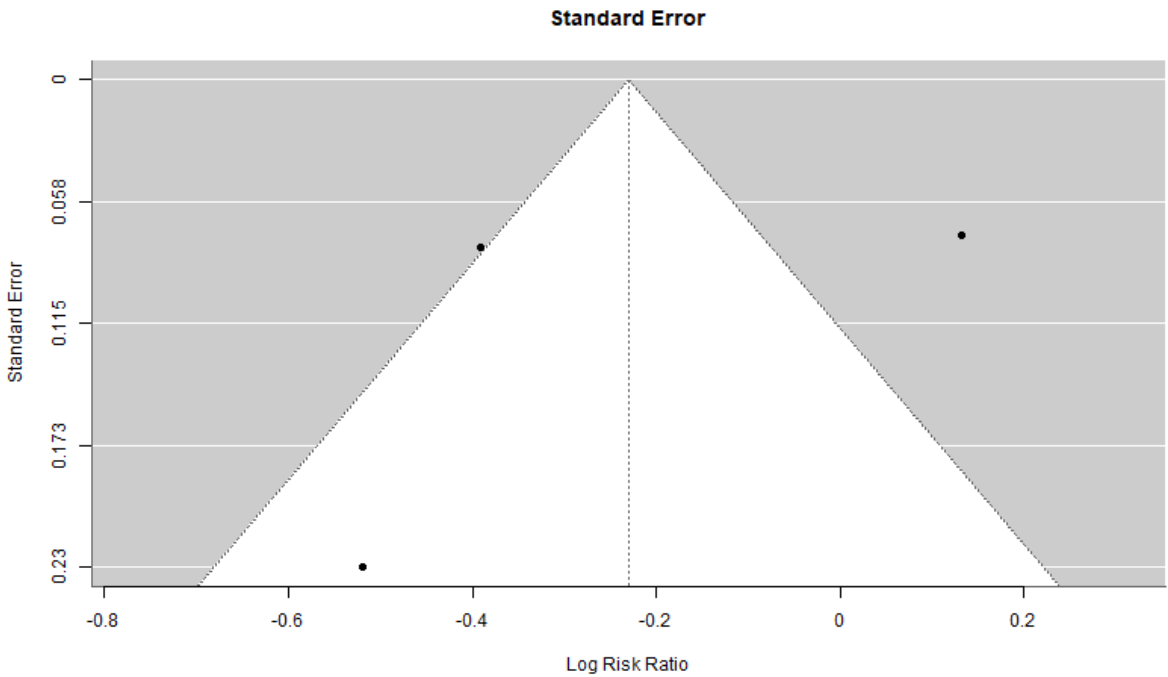

**Appendix A – Subgroup analyses****A.5 Subgroup analyses****A.5.1 outcome**

|                         | total |             | infection |              | hospital |             | mortality |              |   |
|-------------------------|-------|-------------|-----------|--------------|----------|-------------|-----------|--------------|---|
| 2923                    | 3.58  | [1.46;8.77] | 5.28      | [0.70;39.84] | 1.47     | [0.80;2.70] | 6.59      | [3.97;10.94] | 2 |
| 2930                    | 2.53  | [1.75;3.67] | 1.85      | [1.24;2.77]  |          |             | 3.11      | [2.45;3.93]  | 2 |
| 5133                    | 2.52  | [2.27;2.79] | 2.35      | [2.14;2.59]  |          |             | 2.73      | [2.24;3.33]  | 2 |
| 5211                    | 1.80  | [1.19;2.73] | 1.30      | [1.12;1.52]  | 2.30     | [1.25;4.23] | 3.23      | [2.81;3.71]  | 2 |
| 5213                    | 1.36  | [0.89;2.09] | 1.19      | [0.76;1.88]  |          |             | 2.24      | [1.80;2.78]  | 2 |
| 5311                    | 1.52  | [1.03;2.23] | 1.34      | [0.97;1.85]  |          |             | 1.59      | [0.91;2.78]  | 2 |
| 5318                    | 1.90  | [1.37;2.64] | 1.69      | [1.15;2.47]  |          |             | 2.08      | [1.25;3.46]  | 2 |
| 5321                    | 2.08  | [0.99;4.37] | 1.50      | [0.97;2.31]  |          |             | 6.18      | [3.94;9.69]  | 2 |
| 5411                    | 2.55  | [1.51;4.31] | 3.61      | [3.24;4.03]  |          |             | 2.11      | [1.11;4.02]  | 1 |
| 6132                    | 1.77  | [0.46;6.84] | 0.79      | [0.48;1.31]  |          |             | 2.62      | [0.39;17.83] | 2 |
| 6210                    | 1.18  | [0.99;1.41] | 1.08      | [0.88;1.33]  | 0.98     | [0.75;1.28] | 1.59      | [1.35;1.88]  | 2 |
| 6211                    | 1.08  | [0.91;1.27] | 1.04      | [0.86;1.24]  |          |             | 1.33      | [0.64;2.75]  | 2 |
| 6230                    | 1.29  | [0.94;1.79] |           |              |          |             |           |              | 0 |
| 6330                    | 1.41  | [1.01;1.97] | 1.20      | [0.54;2.70]  |          |             | 1.61      | [1.22;2.12]  | 2 |
| 7110                    | 1.22  | [0.56;2.70] | 1.76      | [0.99;3.13]  |          |             | 0.57      | [0.36;0.91]  | 1 |
| 7211                    | 1.54  | [0.96;2.48] | 1.11      | [0.94;1.32]  |          |             | 2.16      | [0.94;4.98]  | 2 |
| 7221                    | 0.59  | [0.45;0.77] | 0.51      | [0.43;0.59]  |          |             | 0.71      | [0.52;0.97]  | 2 |
| 8311                    | 1.10  | [0.69;1.76] | 1.24      | [0.49;3.15]  | 0.83     | [0.60;1.15] | 1.10      | [0.47;2.54]  | 1 |
| 8312                    | 1.55  | [1.11;2.16] | 1.42      | [0.76;2.65]  |          |             | 1.77      | [1.27;2.48]  | 2 |
| 8411                    | 0.79  | [0.53;1.18] | 0.88      | [0.53;1.47]  |          |             | 0.60      | [0.38;0.93]  | 1 |
|                         |       |             |           |              |          |             |           |              |   |
| 1 infection > mortality |       |             |           |              |          |             |           |              |   |
| 2 mortality > infection |       |             |           |              |          |             |           |              |   |

**A.5.2 comparison group**

|                              | total |             | admin |             | non-ess. |  | other |               | gen pop |              |   |
|------------------------------|-------|-------------|-------|-------------|----------|--|-------|---------------|---------|--------------|---|
| 2923                         | 3.58  | [1.46;8.77] |       |             |          |  | 5.28  | [0.70;39.84]  | 3.14    | [0.72;13.68] | 0 |
| 2930                         | 2.53  | [1.75;3.67] | 1.85  | [1.24;2.77] |          |  |       |               | 3.11    | [2.45;3.93]  | 2 |
| 5133                         | 2.52  | [2.27;2.79] | 2.65  | [1.92;3.66] |          |  | 2.59  | [2.34;2.87]   |         |              | 0 |
| 5211                         | 1.80  | [1.19;2.73] | 1.36  | [0.53;3.49] |          |  |       |               | 1.87    | [1.17;2.99]  | 2 |
| 5213                         | 1.36  | [0.89;2.09] | 0.87  | [0.65;1.15] |          |  |       |               | 1.82    | [1.23;2.68]  | 2 |
| 5311                         | 1.52  | [1.03;2.23] | 1.34  | [0.97;1.85] |          |  |       |               | 1.59    | [0.91;2.78]  | 2 |
| 5318                         | 1.90  | [1.37;2.64] | 1.76  | [1.36;2.28] |          |  | 1.47  | [1.27;1.70]   | 3.21    | [2.71;3.79]  | 2 |
| 5321                         | 2.08  | [0.99;4.37] | 1.21  | [0.81;1.82] |          |  |       |               | 3.49    | [1.20;10.19] | 2 |
| 5411                         | 2.55  | [1.51;4.31] | 3.57  | [3.21;3.97] |          |  | 1.56  | [1.42;1.72]   |         |              | 0 |
| 6132                         | 1.77  | [0.46;6.84] | 0.79  | [0.48;1.31] |          |  |       |               | 2.62    | [0.39;17.83] | 2 |
| 6210                         | 1.18  | [0.99;1.41] | 1.23  | [1.10;1.37] |          |  |       |               | 1.18    | [0.85;1.63]  | 1 |
| 6211                         | 1.08  | [0.91;1.27] | 0.97  | [0.54;1.75] |          |  |       |               | 1.17    | [0.82;1.66]  | 2 |
| 6230                         | 1.29  | [0.94;1.79] | 1.29  | [0.87;1.92] |          |  |       |               | 1.28    | [0.77;2.15]  | 1 |
| 6330                         | 1.41  | [1.01;1.97] | 1.07  | [0.79;1.45] |          |  | 1.53  | [1.38;1.71]   | 1.51    | [0.87;2.60]  | 2 |
| 7110                         | 1.22  | [0.56;2.70] |       |             |          |  |       |               |         |              | 0 |
| 7211                         | 1.54  | [0.96;2.48] | 1.23  | [0.67;2.26] |          |  |       |               | 1.67    | [0.88;3.17]  | 2 |
| 7221                         | 0.59  | [0.45;0.77] | 0.54  | [0.42;0.70] |          |  |       |               | 0.71    | [0.48;1.04]  | 2 |
| 8311                         | 1.10  | [0.69;1.76] | 0.80  | [0.45;1.40] |          |  | 16.12 | [1.69;153.55] | 1.06    | [0.61;1.84]  | 2 |
| 8312                         | 1.55  | [1.11;2.16] | 1.44  | [0.94;2.19] |          |  |       |               | 1.93    | [1.30;2.86]  | 2 |
| 8411                         | 0.79  | [0.53;1.18] |       |             |          |  |       |               |         |              | 0 |
|                              |       |             |       |             |          |  |       |               |         |              |   |
| 1 admin > general population |       |             |       |             |          |  |       |               |         |              |   |
| 2 general population > admin |       |             |       |             |          |  |       |               |         |              |   |



**Appendix A – Subgroup analyses****A.5.3 risk of bias**

|      | total                |  | low               |  | high             |  |   |
|------|----------------------|--|-------------------|--|------------------|--|---|
| 2923 | 3.58 [1.46;8.77]     |  | 6.59 [3.97;10.94] |  | 2.64 [2.64;8.77] |  | 1 |
| 2930 | 2.53 [1.75;3.67]     |  | 3.11 [2.45;3.93]  |  | 1.85 [1.24;3.67] |  | 1 |
| 5133 | 2.52 [2.27;2.79]     |  |                   |  |                  |  | 0 |
| 5211 | 1.80 [1.19;2.73]     |  | 1.77 [0.97;3.23]  |  | 1.97 [1.18;3.28] |  | 2 |
| 5213 | 1.36 [0.89;2.09]     |  | 1.82 [1.23;2.68]  |  | 0.87 [0.65;1.15] |  | 1 |
| 5311 | 1.52 [1.03;2.23]     |  | 1.59 [0.91;2.78]  |  | 1.34 [0.97;1.85] |  | 1 |
| 5318 | 1.90 [1.37;2.64]     |  | 3.21 [2.71;3.79]  |  | 1.64 [1.34;2.02] |  | 1 |
| 5321 | 2.08 [0.99;4.37]     |  | 6.18 [3.94;9.69]  |  | 1.50 [0.97;2.31] |  | 1 |
| 5411 | 2.55 [1.51;4.31]     |  |                   |  |                  |  | 0 |
| 6132 | 1.77 [0.46;6.84]     |  | 2.62 [0.39;17.83] |  | 0.79 [0.48;1.31] |  | 1 |
| 6210 | 1.18 [0.99;1.41]     |  | 1.23 [0.83;1.83]  |  | 1.17 [1.03;1.34] |  | 1 |
| 6211 | 1.08 [0.91;1.27]     |  | 1.33 [0.64;2.75]  |  | 1.04 [0.86;1.24] |  | 1 |
| 6230 | 1.29 [0.94;1.79]     |  | 1.28 [0.77;2.15]  |  | 1.29 [0.87;1.92] |  | 2 |
| 6330 | 1.41 [1.01;1.97]     |  | 1.46 [0.87;2.44]  |  | 1.38 [0.88;2.17] |  | 1 |
| 7110 | 1.22 [0.56;2.70]     |  |                   |  |                  |  | 0 |
| 7211 | 1.54 [0.96;2.48]     |  | 2.16 [0.94;4.98]  |  | 1.11 [0.94;1.32] |  | 1 |
| 7221 | 0.59 [0.45;0.77]     |  | 0.71 [0.48;1.04]  |  | 0.54 [0.42;0.70] |  | 1 |
| 8311 | 1.10 [0.69;1.76]     |  | 0.89 [0.50;1.58]  |  | 1.56 [0.64;3.80] |  | 2 |
| 8312 | 1.55 [1.11;2.16]     |  | 1.93 [1.30;2.86]  |  | 1.44 [0.94;2.19] |  | 1 |
| 8411 | 0.79 [0.53;1.18]     |  |                   |  |                  |  | 0 |
|      |                      |  |                   |  |                  |  |   |
|      | 1 low RoB > high RoB |  |                   |  |                  |  |   |
|      | 2 high RoB > low RoB |  |                   |  |                  |  |   |
